# Supplementary material
Source: publisher figshare collection journal article supplement (https://frontiersin.figshare.com/ndownloader/files/24492935)
Supplement: Supplementary file 1 [file 24492935]

## Sheet: Web of Science
WEB OF SCIENCE SEARCH RESULTS
(TS=("environmental DNA" AND "fish" AND "metabarcoding")) AND LANGUAGE: (English) AND DOCUMENT TYPES: (Article)
Timespan=2008-2020. Indexes=SCI-EXPANDED, SSCI, A&HCI, CPCI-S, CPCI-SSH, BKCI-S, BKCI-SSH, ESCI, CCR-EXPANDED, IC.
Results found	77
Title	Authors	Source Title	Publication Date	Publication Year	Volume	Issue	Beginning Page	Ending Page	Article Number	DOI									1	0.5	0	0	0	0	0	0	0	0	0	0	0	1	0
Detection of a Diverse Marine Fish Fauna Using Environmental DNA from Seawater Samples	Thomsen, Philip Francis; Kielgast, Jos; Iversen, Lars Lonsmann; Moller, Peter Rask; Rasmussen, Morten; Willerslev, Eske	PLOS ONE	AUG 29 2012	2012	7	8			e41732	10.1371/journal.pone.0041732
Quantifying sequence proportions in a DNA-based diet study using Ion Torrent amplicon sequencing: which counts count?	Deagle, Bruce E.; Thomas, Austen C.; Shaffer, Amanda K.; Trites, Andrew W.; Jarman, Simon N.	MOLECULAR ECOLOGY RESOURCES	JUL 2013	2013	13	4	620	633		10.1111/1755-0998.12103
Environmental monitoring through protist next-generation sequencing metabarcoding: assessing the impact of fish farming on benthic foraminifera communities	Pawlowski, Jan; Esling, Philippe; Lejzerowicz, Franck; Cedhagen, Tomas; Wilding, Thomas A.	MOLECULAR ECOLOGY RESOURCES	NOV 2014	2014	14	6	1129	1140		10.1111/1755-0998.12261
High-throughput sequencing and morphology perform equally well for benthic monitoring of marine ecosystems	Lejzerowicz, Franck; Esling, Philippe; Pillet, Loic; Wilding, Thomas A.; Black, Kenneth D.; Pawlowski, Jan	SCIENTIFIC REPORTS	SEP 10 2015	2015	5				13932	10.1038/srep13932
MiFish, a set of universal PCR primers for metabarcoding environmental DNA from fishes: detection of more than 230 subtropical marine species	Miya, M.; Sato, Y.; Fukunaga, T.; Sado, T.; Poulsen, J. Y.; Sato, K.; Minamoto, T.; Yamamoto, S.; Yamanaka, H.; Araki, H.; Kondoh, M.; Iwasaki, W.	ROYAL SOCIETY OPEN SCIENCE	JUL 2015	2015	2	7			150088	10.1098/rsos.150088
Accurate assessment of the impact of salmon farming on benthic sediment enrichment using foraminiferal metabarcoding	Pochon, X.; Wood, S. A.; Keeley, N. B.; Lejzerowicz, F.; Esling, P.; Drew, J.; Pawlowski, J.	MARINE POLLUTION BULLETIN	NOV 15 2015	2015	100	1	370	382		10.1016/j.marpolbul.2015.08.022
Metabarcoding approach for the ballast water surveillance - An advantageous solution or an awkward challenge?	Zaiko, Anastasija; Martinez, Jose L.; Schmidt-Petersen, Julia; Ribicic, Deni; Samuiloviene, Aurelija; Garcia-Vazquez, Eva	MARINE POLLUTION BULLETIN	MAR 15 2015	2015	92	1-2	25	34		10.1016/j.marpolbul.2015.01.008
Spatial Representativeness of Environmental DNA Metabarcoding Signal for Fish Biodiversity Assessment in a Natural Freshwater System	Civade, Raphael; Dejean, Tony; Valentini, Alice; Roset, Nicolas; Raymond, Jean-Claude; Bonin, Aurelie; Taberlet, Pierre; Pont, Didier	PLOS ONE	JUN 30 2016	2016	11	6			e0157366	10.1371/journal.pone.0157366
Quantification of mesocosm fish and amphibian species diversity via environmental DNA metabarcoding	Evans, Nathan T.; Olds, Brett P.; Renshaw, Mark A.; Turner, Cameron R.; Li, Yiyuan; Jerde, Christopher L.; Mahon, Andrew R.; Pfrender, Michael E.; Lamberti, Gary A.; Lodge, David M.	MOLECULAR ECOLOGY RESOURCES	JAN 2016	2016	16	1	29	41		10.1111/1755-0998.12433
A case study for assessing fish traceability in Egyptian aquafeed formulations using pyrosequencing and metabarcoding	Galal-Khallaf, Asmaa; Osman, Alaa G. M.; Carleos, Carlos E.; Garcia-Vazquez, Eva; Borrell, Yaisel J.	FISHERIES RESEARCH	FEB 2016	2016	174		143	150		10.1016/j.fishres.2015.09.009
Environmental DNA metabarcoding of lake fish communities reflects long-term data from established survey methods	Hanfling, Bernd; Handley, Lori Lawson; Read, Daniel S.; Hahn, Christoph; Li, Jianlong; Nichols, Paul; Blackman, Rosetta C.; Oliver, Anna; Winfield, Ian J.	MOLECULAR ECOLOGY	JUL 2016	2016	25	13	3101	3119		10.1111/mec.13660
Detection of rare and invasive freshwater fish species using eDNA pyrosequencirig: Lake Iznik ichthyofauna revised	Keskin, Emre; Unal, Esra Mine; Atar, Hasan Huseyin	BIOCHEMICAL SYSTEMATICS AND ECOLOGY	AUG 2016	2016	67		29	36		10.1016/j.bse.2016.05.020
Use of a Filter Cartridge for Filtration of Water Samples and Extraction of Environmental DNA	Miya, Masaki; Minamoto, Toshifumi; Yamanaka, Hiroki; Oka, Shin-ichiro; Sato, Keiichi; Yamamoto, Satoshi; Sado, Tetsuya; Doi, Hideyuki	JOVE-JOURNAL OF VISUALIZED EXPERIMENTS	NOV 2016	2016		117			e54741	10.3791/54741
Estimating species richness using environmental DNA	Olds, Brett P.; Jerde, Christopher L.; Renshaw, Mark A.; Li, Yiyuan; Evans, Nathan T.; Turner, Cameron R.; Deiner, Kristy; Mahon, Andrew R.; Brueseke, Michael A.; Shirey, Patrick D.; Pfrender, Michael E.; Lodge, David M.; Lamberti, Gary A.	ECOLOGY AND EVOLUTION	JUN 2016	2016	6	12	4214	4226		10.1002/ece3.2186
Benthic monitoring of salmon farms in Norway using foraminiferal metabarcoding	Pawlowski, Jan; Esling, Philippe; Lejzerowicz, Franck; Cordier, Tristan; Visco, Joana A.; Martins, Catarina I. M.; Kvalvik, Arne; Staven, Knut; Cedhagen, Tomas	AQUACULTURE ENVIRONMENT INTERACTIONS	2016	2016	8		371	386		10.3354/aei00182
Assessing vertebrate biodiversity in a kelp forest ecosystem using environmental DNA	Port, Jesse A.; O'Donnell, James L.; Romero-Maraccini, Ofelia C.; Leary, Paul R.; Litvin, Steven Y.; Nickols, Kerry J.; Yamahara, Kevan M.; Kelly, Ryan P.	MOLECULAR ECOLOGY	JAN 2016	2016	25	2	527	541		10.1111/mec.13481
Comparison of environmental DNA metabarcoding and conventional fish survey methods in a river system	Shaw, Jennifer L. A.; Clarke, Laurence J.; Wedderburn, Scotte D.; Barnes, Thomas C.; Weyrich, Laura S.; Cooper, Alan	BIOLOGICAL CONSERVATION	MAY 2016	2016	197		131	138		10.1016/j.biocon.2016.03.010
Quantitative DNA metabarcoding: improved estimates of species proportional biomass using correction factors derived from control material	Thomas, Austen C.; Deagle, Bruce E.; Eveson, J. Paige; Harsch, Corie H.; Trites, Andrew W.	MOLECULAR ECOLOGY RESOURCES	MAY 2016	2016	16	3	714	726		10.1111/1755-0998.12490
Environmental DNA from Seawater Samples Correlate with Trawl Catches of Subarctic, Deepwater Fishes	Thomsen, Philip Francis; Moller, Peter Rask; Sigsgaard, Eva Egelyng; Knudsen, Steen Wilhelm; Jorgensen, Ole Ankjaer; Willerslev, Eske	PLOS ONE	NOV 16 2016	2016	11	11			e0165252	10.1371/journal.pone.0165252
Next-generation monitoring of aquatic biodiversity using environmental DNA metabarcoding	Valentini, Alice; Taberlet, Pierre; Miaud, Claude; Civade, Raphael; Herder, Jelger; Thomsen, Philip Francis; Bellemain, Eva; Besnard, Aurelien; Coissac, Eric; Boyer, Frederic; Gaboriaud, Coline; Jean, Pauline; Poulet, Nicolas; Roset, Nicolas; Copp, Gordon H.; Geniez, Philippe; Pont, Didier; Argillier, Christine; Baudoin, Jean-Marc; Peroux, Tiphaine; Crivelli, Alain J.; Olivier, Anthony; Acqueberg…	MOLECULAR ECOLOGY	FEB 2016	2016	25	4	929	942		10.1111/mec.13428
Freshwater vertebrate metabarcoding on Illumina platforms using double-indexed primers of the mitochondrial 16S rRNA gene	Vences, Miguel; Lyra, Mariana L.; Perl, R. G. Bina; Bletz, Molly C.; Stankovic, David; Lopes, Carla Martins; Jarek, Michael; Bhuju, Sabin; Geffers, Robert; Haddad, Celio F. B.; Steinfartz, Sebastian	CONSERVATION GENETICS RESOURCES	SEP 2016	2016	8	3	323	327		10.1007/s12686-016-0550-y
Persistence of marine fish environmental DNA and the influence of sunlight	Andruszkiewicz, Elizabeth A.; Sassoubre, Lauren M.; Boehm, Alexandria B.	PLOS ONE	SEP 15 2017	2017	12	9			e0185043	10.1371/journal.pone.0185043
Biomonitoring of marine vertebrates in Monterey Bay using eDNA metabarcoding	Andruszkiewicz, Elizabeth A.; Starks, Hilary A.; Chavez, Francisco P.; Sassoubre, Lauren M.; Block, Barbara A.; Boehm, Alexandria B.	PLOS ONE	APR 25 2017	2017	12	4			e0176343	10.1371/journal.pone.0176343
Environmental DNA reveals tropical shark diversity in contrasting levels of anthropogenic impact	Bakker, Judith; Wangensteen, Owen S.; Chapman, Demian D.; Boussarie, Germain; Buddo, Dayne; Guttridge, Tristan L.; Hertler, Heidi; Mouillot, David; Vigliola, Laurent; Mariani, Stefano	SCIENTIFIC REPORTS	DEC 4 2017	2017	7				16886	10.1038/s41598-017-17150-2
Predicting the Ecological Quality Status of Marine Environments from eDNA Metabarcoding Data Using Supervised Machine Learning	Cordier, Tristan; Esling, Philippe; Lejzerowicz, Franck; Visco, Joana; Ouadahi, Amine; Martins, Catarina; Cedhagen, Tomas; Pawlowski, Jan	ENVIRONMENTAL SCIENCE & TECHNOLOGY	AUG 15 2017	2017	51	16	9118	9126		10.1021/acs.est.7b01518
A from-benchtop-to-desktop workflow for validating HTS data and for taxonomic identification in diet metabarcoding studies	Corse, Emmanuel; Meglecz, Emese; Archambaud, Gait; Ardisson, Morgane; Martin, Jean-Francois; Tougard, Christelle; Chappaz, Remi; Dubut, Vincent	MOLECULAR ECOLOGY RESOURCES	NOV 2017	2017	17	6	e146	e159		10.1111/1755-0998.12703
Long-range PCR allows sequencing of mitochondrial genomes from environmental DNA	Deiner, Kristy; Renshaw, Mark A.; Li, Yiyuan; Olds, Brett P.; Lodge, David M.; Pfrender, Michael E.	METHODS IN ECOLOGY AND EVOLUTION	DEC 2017	2017	8	12	1888	1898		10.1111/2041-210X.12836
Assessing the utility of eDNA as a tool to survey reef-fish communities in the Red Sea	DiBattista, Joseph D.; Coker, Darren J.; Sinclair-Taylor, Tane H.; Stat, Michael; Berumen, Michael L.; Bunce, Michael	CORAL REEFS	DEC 2017	2017	36	4	1245	1252		10.1007/s00338-017-1618-1
Fish community assessment with eDNA metabarcoding: effects of sampling design and bioinformatic filtering	Evans, Nathan T.; Li, Yiyuan; Renshaw, Mark A.; Olds, Brett P.; Deiner, Kristy; Turner, Cameron R.; Jerde, Christopher L.; Lodge, David M.; Lamberti, Gary A.; Pfrender, Michael E.	CANADIAN JOURNAL OF FISHERIES AND AQUATIC SCIENCES	SEP 2017	2017	74	9	1362	1374		10.1139/cjfas-2016-0306
Genetic and Manual Survey Methods Yield Different and Complementary Views of an Ecosystem	Kelly, Ryan P.; Closek, Collin J.; O'Donnell, James L.; Kralj, James E.; Shelton, Andrew O.; Samhouri, Jameal F.	FRONTIERS IN MARINE SCIENCE	2017	2017	3				UNSP 283	10.3389/fmars.2016.00283
Usefulness and limitations of sample pooling for environmental DNA metabarcoding of freshwater fish communities	Sato, Hirotoshi; Sogo, Yuki; Doi, Hideyuki; Yamanaka, Hiroki	SCIENTIFIC REPORTS	NOV 1 2017	2017	7				14860	10.1038/s41598-017-14978-6
Seawater environmental DNA reflects seasonality of a coastal fish community	Sigsgaard, Eva Egelyng; Nielsen, Ida Broman; Carl, Henrik; Krag, Marcus Anders; Knudsen, Steen Wilhelm; Xing, Yingchun; Holm-Hansen, Tore Hejl; Moller, Peter Rask; Thomsen, Philip Francis	MARINE BIOLOGY	JUN 2017	2017	164	6			128	10.1007/s00227-017-3147-4
Ecosystem biomonitoring with eDNA: metabarcoding across the tree of life in a tropical marine environment	Stat, Michael; Huggett, Megan J.; Bernasconi, Rachele; DiBattista, Joseph D.; Berry, Tina E.; Newman, Stephen J.; Harvey, Euan S.; Bunce, Michael	SCIENTIFIC REPORTS	SEP 25 2017	2017	7				12240	10.1038/s41598-017-12501-5
Environmental DNA enables detection of terrestrial mammals from forest pond water	Ushio, Masayuki; Fukuda, Hisato; Inoue, Toshiki; Makoto, Kobayashi; Kishida, Osamu; Sato, Keiichi; Murata, Koichi; Nikaido, Masato; Sado, Tetsuya; Sato, Yukuto; Takeshita, Masamichi; Iwasaki, Wataru; Yamanaka, Hiroki; Kondoh, Michio; Miya, Masaki	MOLECULAR ECOLOGY RESOURCES	NOV 2017	2017	17	6	e63	e75		10.1111/1755-0998.12690
Environmental DNA metabarcoding reveals local fish communities in a species-rich coastal sea	Yamamoto, Satoshi; Masuda, Reiji; Sato, Yukuto; Sado, Tetsuya; Araki, Hitoshi; Kondoh, Michio; Minamoto, Toshifumi; Miya, Masaki	SCIENTIFIC REPORTS	JAN 12 2017	2017	7				40368	10.1038/srep40368
Environmental DNA detection of rare and invasive fish species in two Great Lakes tributaries	Balasingham, Katherine D.; Walter, Ryan P.; Mandrak, Nicholas E.; Heath, Daniel D.	MOLECULAR ECOLOGY	JAN 2018	2018	27	1	112	127		10.1111/mec.14395
Spatial and temporal dynamics of a freshwater eukaryotic plankton community revealed via 18S rRNA gene metabarcoding	Banerji, A.; Bagley, M.; Elk, M.; Pilgrim, E.; Martinson, J.; Domingo, J. Santo	HYDROBIOLOGIA	AUG 2018	2018	818	1	71	86		10.1007/s10750-018-3593-0
Does Size Matter? An Experimental Evaluation of the Relative Abundance and Decay Rates of Aquatic Environmental DNA	Bylemans, Jonas; Furlan, Elise M.; Gleeson, Dianne M.; Hardy, Christopher M.; Duncan, Richard P.	ENVIRONMENTAL SCIENCE & TECHNOLOGY	JUN 5 2018	2018	52	11	6408	6416		10.1021/acs.est.8b01071
Toward an ecoregion scale evaluation of eDNA metabarcoding primers: A case study for the freshwater fish biodiversity of the Murray-Darling Basin (Australia)	Bylemans, Jonas; Gleeson, Dianne M.; Hardy, Christopher M.; Furlan, Elise	ECOLOGY AND EVOLUTION	SEP 2018	2018	8	17	8697	8712		10.1002/ece3.4387
Evaluating metabarcoding to analyse diet composition of species foraging in anthropogenic landscapes using Ion Torrent and Illumina sequencing	Forin-Wiart, Marie-Amelie; Poulle, Marie-Lazarine; Piry, Sylvain; Cosson, Jean-Francois; Larose, Claire; Galan, Maxime	SCIENTIFIC REPORTS	NOV 20 2018	2018	8				17091	10.1038/s41598-018-34430-7
Direct fishing and eDNA metabarcoding for biomonitoring during a 3-year survey significantly improves number of fish detected around a South East Asian reservoir	Gillet, Benjamin; Cottet, Maud; Destanque, Thibault; Kue, Kaoboun; Descloux, Stephane; Chanudet, Vincent; Hughes, Sandrine	PLOS ONE	DEC 13 2018	2018	13	12			e0208592	10.1371/journal.pone.0208592
Development and preliminary validation of a multi-trophic metabarcoding biotic index for monitoring benthic organic enrichment	Keeley, Nigel; Wood, Susanna A.; Pochon, Xavier	ECOLOGICAL INDICATORS	FEB 2018	2018	85		1044	1057		10.1016/j.ecolind.2017.11.014
The effect of filtration method on the efficiency of environmental DNA capture and quantification via metabarcoding	Li, Jianlong; Handley, Lori-Jayne Lawson; Read, Daniel S.; Hanfling, Bernd	MOLECULAR ECOLOGY RESOURCES	SEP 2018	2018	18	5	1102	1114		10.1111/1755-0998.12899
Investigating diversity of pathogenic microbes in commercial bait trade water	Mahon, Andrew R.; Horton, Dean J.; Learman, Deric R.; Nathan, Lucas R.; Jerde, Christopher L.	PEERJ	AUG 23 2018	2018	6				e5468	10.7717/peerj.5468
Metabarcoding by capture using a single COI probe (MCSP) to identify and quantify fish species in ichthyoplankton swarms	Mariac, C.; Vigouroux, Y.; Duponchelle, F.; Garcia-Davila, C.; Nunez, J.; Desmarais, E.; Renno, J. F.	PLOS ONE	SEP 12 2018	2018	13	9			e0202976	10.1371/journal.pone.0202976
More (or less?) bounce for the ounce: a comparison of environmental DNA and classical approaches for bioassessment	McInerney, Paul J.; Rees, Gavin N.	MARINE AND FRESHWATER RESEARCH	2018	2018	69	6	992	996		10.1071/MF17250
Comparing local- and regional-scale estimations of the diversity of stream fish using eDNA metabarcoding and conventional observation methods	Nakagawa, Hikaru; Yamamoto, Satoshi; Sato, Yukuto; Sado, Tetsuya; Minamoto, Toshifumi; Miya, Masaki	FRESHWATER BIOLOGY	JUN 2018	2018	63	6	569	580		10.1111/fwb.13094
Environmental DNA reveals quantitative patterns of fish biodiversity in large rivers despite its downstream transportation	Pont, Didier; Rocle, Mathieu; Valentini, Alice; Civade, Raphael; Jean, Pauline; Maire, Anthony; Roset, Nicolas; Schabuss, Michael; Zornig, Horst; Dejean, Tony	SCIENTIFIC REPORTS	JUL 10 2018	2018	8				10361	10.1038/s41598-018-28424-8
MitoFish and MiFish Pipeline: A Mitochondrial Genome Database of Fish with an Analysis Pipeline for Environmental DNA Metabarcoding	Sato, Yukuto; Miya, Masaki; Fukunaga, Tsukasa; Sado, Tetsuya; Iwasaki, Wataru	MOLECULAR BIOLOGY AND EVOLUTION	JUN 2018	2018	35	6	1553	1555		10.1093/molbey/msy074
Combined use of eDNA metabarcoding and video surveillance for the assessment of fish biodiversity	Stat, Michael; John, Jeffrey; DiBattista, Joseph D.; et al.	CONSERVATION BIOLOGY		2018	0	0	1	10		10.1111/cobi.13183
GoFish: A versatile nested PCR strategy for environmental DNA assays for marine vertebrates	Stoeckle, Mark Y.; Das Mishu, Mithun; Charlop-Powers, Zachary	PLOS ONE	DEC 11 2018	2018	13	12			e0198717	10.1371/journal.pone.0198717
Real-time multiplex PCR for simultaneous detection of multiple species from environmental DNA: an application on two Japanese medaka species	Tsuji, Satsuki; Iguchi, Yuka; Shibata, Naoki; Teramura, Iori; Kitagawa, Tadao; Yamanaka, Hiroki	SCIENTIFIC REPORTS	JUN 14 2018	2018	8				9138	10.1038/s41598-018-27434-w
Demonstration of the potential of environmental DNA as a tool for the detection of avian species	Ushio, Masayuki; Murata, Koichi; Sado, Tetsuya; Nishiumi, Isao; Takeshita, Masamichi; Iwasaki, Wataru; Miya, Masaki	SCIENTIFIC REPORTS	MAR 14 2018	2018	8				4493	10.1038/s41598-018-22817-5
High-throughput environmental DNA analysis informs a biological assessment of an urban stream	Bagley, Mark; Pilgrim, Erik; Knapp, Martin; Yoder, Chris; Domingo, Jorge Santo; Banerji, Aabir	ECOLOGICAL INDICATORS	SEP 2019	2019	104		378	389		10.1016/j.ecolind.2019.04.088
The effects of spatial and temporal replicate sampling on eDNA metabarcoding	Beentjes, Kevin K.; Speksnijder, Arjen G. C. L.; Schilthuizen, Menno; Hoogeveen, Marten; van der Hoorn, Berry B.	PEERJ	JUL 26 2019	2019	7				e7335	10.7717/peerj.7335
Optimizing environmental DNA sampling effort for fish inventories in tropical streams and rivers	Cantera, Isabel; Cilleros, Kevin; Valentini, Alice; et al	SCIENTIFIC REPORTS	FEB	2019	9				3085
Unlocking biodiversity and conservation studies in high-diversity environments using environmental DNA (eDNA): A test with Guianese freshwater fishes	Cilleros, Kevin; Valentini, Alice; Allard, Luc; et al.	MOLECULAR ECOLOGY RESOURCES	JAN	2019	19	1	27	46
Marine Vertebrate Biodiversity and Distribution Within the Central California Current Using Environmental DNA (eDNA) Metabarcoding and Ecosystem Surveys	Closek, Collin J.; Santora, Jarrod A.; Starks, Hilary A.; Schroeder, Isaac D.; Andruszkiewicz, Elizabeth A.; Sakuma, Keith M.; Bograd, Steven J.; Hazenv, Elliott L.; Field, John C.; Boehm, Alexandria B.	FRONTIERS IN MARINE SCIENCE	DEC 16 2019	2019	6				732	10.3389/fmars.2019.00732
Non-specific amplification compromises environmental DNA metabarcoding with COI	Collins, Rupert A.; Bakker, Judith; Wangensteen, Owen S.; Soto, Ana Z.; Corrigan, Laura; Sims, David W.; Genner, Martin J.; Mariani, Stefano	METHODS IN ECOLOGY AND EVOLUTION	NOV 2019	2019	10	11	1985	2001		10.1111/2041-210X.13276
Digging for DNA at depth: rapid universal metabarcoding surveys (RUMS) as a tool to detect coral reef biodiversity across a depth gradient	DiBattista, Joseph D.; Reimer, James D.; Stat, Michael; et al.	PEERJ	FEB	2019	7				e6379
Environmental DNA metabarcoding for fish community analysis in backwater lakes: A comparison of capture methods	Fujii, Kazuya; Doi, Hideyuki; Matsuoka, Shunsuke; et al.	PLOS ONE	JAN	2019	14	1			e0210357
Parasitic protozoan interactions with bacterial microbiome in a tropical fish farm	Gomes, Giana Bastos; Hutson, Kate S.; Domingos, Jose A.; et al.	AQUACULTURE	MAR	2019	502		196	201
Responses of foraminifera communities to aquaculture-derived organic enrichment as revealed by environmental DNA metabarcoding	He, Xiaoping; Sutherland, Terri F.; Pawlowski, Jan; et al.	MOLECULAR ECOLOGY	MAR	2019	28	5	1138	1153
Environmental DNA (eDNA) metabarcoding reveals strong discrimination among diverse marine habitats connected by water movement	Jeunen, Gert-Jan; Knapp, Michael; Spencer, Hamish G.; et al.	MOLECULAR ECOLOGY RESOURCES	MAR	2019	19	2	426	438
Comparison of Water Sampling between Environmental DNA Metabarcoding and Conventional Microscopic Identification: A Case Study in Gwangyang Bay, South Korea	Kim, Dong-Kyun; Park, Kiyun; Jo, Hyunbin; Kwak, Ihn-Sil	APPLIED SCIENCES-BASEL	AUG 2019	2019	9	16			3272	10.3390/app9163272
Fish diversity assessment in the headwaters of the Volga River using environmental DNA metabarcoding	Lecaudey, Laurene A.; Schletterer, Martin; Kuzovlev, Vyacheslav V.; Hahn, Christoph; Weiss, Steven J.	AQUATIC CONSERVATION-MARINE AND FRESHWATER ECOSYSTEMS	OCT 2019	2019	29	10	1785	1800		10.1002/aqc.3163									0	0	0	0	0	0	0	0	0	0	0	0	0	0	0
Ground-truthing of a fish-based environmental DNA metabarcoding method for assessing the quality of lakes	Li, Jianlong; Hatton-Ellis, Tristan W.; Handley, Lori-Jayne Lawson; et al.	JOURNAL OF APPLIED ECOLOGY	MAY	2019	56	5	1232	1244											0	0	0	0	0	0	0	0	0	0	0	0	0	0	0
Environmental DNA metabarcoding as an effective and rapid tool for fish monitoring in canals	McDevitt, Allan D.; Sales, Naiara Guimaraes; Browett, Samuel S.; Sparnenn, Abbie O.; Mariani, Stefano; Wangensteen, Owen S.; Coscia, Ilaria; Benvenuto, Chiara	JOURNAL OF FISH BIOLOGY	AUG 2019	2019	95	2	679	682		10.1111/jfb.14053									0	0	0	0	0	0	0	0	0	0	0	0	0	0	0
Seasonal dynamics of riverine fish communities using eDNA	Milhau, Tristan; Valentini, Alice; Poulet, Nicolas; Roset, Nicolas; Jean, Pauline; Gaboriaud, Coline; Dejean, Tony	JOURNAL OF FISH BIOLOGY		2019						10.1111/jfb.14190									2	1	0	0	0	0	0	0	0	0	0	0	0	2	0
The future of fish-based ecological assessment of European rivers: from traditional EU Water Framework Directive compliant methods to eDNA metabarcoding-based approaches	Pont, Didier; Valentini, Alice; Rocle, Mathieu; Maire, Anthony; Delaigue, Olivier; Jean, Pauline; Dejean, Tony	JOURNAL OF FISH BIOLOGY		2019						10.1111/jfb.14176									1	0.5	0	0	0	0	0	0	0	0	0	0	0	1	0
DNA metabarcoding unveils multiscale trophic variation in a widespread coastal opportunist	Siegenthaler, Andjin; Wangensteen, Owen S.; Benvenuto, Chiara; et al.	MOLECULAR ECOLOGY	JAN	2019	28	2	232	249											0	0	0	0	0	0	0	0	0	0	0	0	0	0	0
Metabarcoding of shrimp stomach content: Harnessing a natural sampler for fish biodiversity monitoring	Siegenthaler, Andjin; Wangensteen, Owen S.; Soto, Ana Z.; et al.	MOLECULAR ECOLOGY RESOURCES	JAN	2019	19	1	206	220											0	0	0	0	0	0	0	0	0	0	0	0	0	0	0
Comprehensive biodiversity analysis via ultra-deep patterned flow cell technology: a case study of eDNA metabarcoding seawater	Singer, G. A. C.; Fahner, N. A.; Barnes, J. G.; et al.	SCIENTIFIC REPORTS	APR	2019	9				5991										3	1.5	0	0	0	0	0	0	0	0	0	0	0	3	0
Linking Environmental DNA and RNA for Improved Detection of the Marine Invasive Fanworm Sabella spallanzanii	von Ammon, Ulla; Wood, Susanna A.; Laroche, Olivier; Zaiko, Anastasija; Lavery, Shane D.; Inglis, Graeme J.; Pochon, Xavier	FRONTIERS IN MARINE SCIENCE	OCT 15 2019	2019	6				621	10.3389/fmars.2019.00621									0	0	0	0	0	0	0	0	0	0	0	0	0	0	0
Mixed-habitat assimilation of organic waste in coastal environments - It's all about synergy!	Keeley, Nigel; Valdemarsen, Thomas; Strohmeier, Tore; Pochon, Xavier; Dahlgren, Thomas; Bannister, Raymond	SCIENCE OF THE TOTAL ENVIRONMENT	JAN 10 2020	2020	699				134281	10.1016/j.scitotenv.2019.134281									0	0	0	0	0	0	0	0	0	0	0	0	0	0	0
Assessment of fish communities using environmental DNA: Effect of spatial sampling design in lentic systems of different sizes	Zhang, Shan; Lu, Qi; Wang, Yiyan; Wang, Xiaomei; Zhao, Jindong; Yao, Meng	MOLECULAR ECOLOGY RESOURCES	JAN 2020	2020	20	1	242	255		10.1111/1755-0998.13105									0	0	0	0	0	0	0	0	0	0	0	0	0	0	0
eDNA metabarcoding as a promising conservation tool for monitoring fish diversity in a coastal wetland of the Pearl River Estuary compared to bottom trawling	Zou, Keshu; Chen, Jianwei; Ruan, Huiting; Li, Zhenhai; Guo, Wenjie; Li, Min; Liu, Li	SCIENCE OF THE TOTAL ENVIRONMENT	FEB 1 2020	2020	702				UNSP 134704	10.1016/j.scitotenv.2019.134704									0	0	0	0	0	0	0	0	0	0	0	0	0	0	0

## Sheet: Google Scholar
GOOGLE SCHOLAR SEARCH RESULTS
Advanced Search Parameters
with all of the words:	fish metabarcoding
with the exact phrase:	environmental DNA
where my words occur:	in the title of the article
return articles dated between:	2008-2020
Results found	21
Title	Authors	Source Title	Publication Date	Publication Year	Volume	Issue	Beginning Page	Ending Page	Article Number	DOI
Comparison of environmental DNA metabarcoding and conventional fish survey methods in a river system.	Shaw, J.L., Clarke, L.J., Wedderburn, S.D., Barnes, T.C., Weyrich, L.S. and Cooper, A.	BIOLOGICAL CONSERVATION	MAY	2016	197		131	138
Environmental DNA metabarcoding as an effective and rapid tool for fish monitoring in canals.	McDevitt, A.D., Sales, N.G., Browett, S.S., Sparnenn, A.O., Mariani, S., Wangensteen, O.S., Coscia, I. and Benvenuto, C.	JOURNAL OF FISH BIOLOGY		2019
Environmental DNA metabarcoding for fish community analysis in backwater lakes: A comparison of capture methods.	Fujii, K., Doi, H., Matsuoka, S., Nagano, M., Sato, H. and Yamanaka, H.	PLOS ONE	JAN	2019	14	1			e0210357
Environmental DNA metabarcoding of lake fish communities reflects long‐term data from established survey methods.	Hänfling, B., Lawson Handley, L., Read, D.S., Hahn, C., Li, J., Nichols, P., Blackman, R.C., Oliver, A. and Winfield, I.J.	MOLECULAR ECOLOGY	JUL	2016	25	13	3101	3119
Environmental DNA metabarcoding reveals local fish communities in a species-rich coastal sea	Yamamoto, S., Masuda, R., Sato, Y., Sado, T., Araki, H., Kondoh, M., Minamoto, T. and Miya, M.	SCIENTIFIC REPORTS	JAN	2017	7				40368
Environmental DNA metabarcoding with MiFish primer reveals marine fish fauna of Tsushima Island, Nagasaki for establishing a marine protected area.	Aizu, M., Seino, S., Sado, T. and Miya, M.		SEP	2017	JSFS 85th Anniversary-Commemorative International Symposium
Estimating fish alpha-and beta-diversity along a small stream with environmental DNA metabarcoding	Li, Y., Evans, N.T., Renshaw, M.A., Jerde, C.L., Olds, B.P., Shogren, A.J., Deiner, K., Lodge, D.M., Lamberti, G.A. and Pfrender, M.E.	METABARCODING AND METAGENOMICS		2018	2				e24262
Fish diversity assessment in the headwaters of the Volga River using environmental DNA metabarcoding	Lecaudey, L.A., Schletterer, M., Kuzovlev, V.V., Hahn, C. and Weiss, S.J.	Aquatic Conservation: Marine and Freshwater Ecosystems		2019	29	10	1785	1800
Ground‐truthing of a fish‐based environmental DNA metabarcoding method for assessing the quality of lakes	Li, J., Hatton‐Ellis, T.W., Lawson Handley, L.J., Kimbell, H.S., Benucci, M., Peirson, G. and Hänfling, B.	JOURNAL OF APPLIED ECOLOGY	MAY	2019	56	5	1232	1244
Limited dispersion and quick degradation of environmental DNA in fish ponds inferred by metabarcoding.	Li, J., Lawson Handley, L.J., Harper, L.R., Brys, R., Watson, H.V., Di Muri, C., Zhang, X. and Hänfling, B.	ENVIRONMENTAL DNA		2018
MitoFish and MiFish pipeline: a mitochondrial genome database of fish with an analysis pipeline for environmental DNA metabarcoding	Sato, Y., Miya, M., Fukunaga, T., Sado, T. and Iwasaki, W.	MOLECULAR BIOLOGY AND EVOLUTION	JUN	2018	35	6	1553	1555
Monitoring freshwater fish communities with environmental DNA (eDNA) metabarcoding	Bylemans, J.			2018	Doctoral dissertation, University of Canberra Australia
Quantification of mesocosm fish and amphibian species diversity via environmental DNA metabarcoding.	Evans, N.T., Olds, B.P., Renshaw, M.A., Turner, C.R., Li, Y., Jerde, C.L., Mahon, A.R., Pfrender, M.E., Lamberti, G.A. and Lodge, D.M.	MOLECULAR ECOLOGY RESOURCES	JAN	2016	16	1	29	41
Spatial representativeness of environmental DNA metabarcoding signal for fish biodiversity assessment in a natural freshwater system	Civade, R., Dejean, T., Valentini, A., Roset, N., Raymond, J.C., Bonin, A., Taberlet, P. and Pont, D.	PLOS ONE	JUN	2016	11	6			e0157366
Usefulness and limitations of sample pooling for environmental DNA metabarcoding of freshwater fish communities	Sato, H., Sogo, Y., Doi, H. and Yamanaka, H.	SCIENTIFIC REPORTS	NOV	2017	7	1			14860
Development of an environmental DNA method for monitoring freshwater fish communities using metabarcoding	Li, J.			2019	Doctoral dissertation, University of Hull
Environmental DNA (eDNA) metabarcoding: Diversity study around the Pondok Dadap fish landing station, Malang, Indonesia.	Andriyono, S., Alam, M.J. and Kim, H.W.	Biodiversitas Journal of Biological Diversity	NOV	2019	20	12
Comparison of fish detections, community diversity, and relative abundance using environmental DNA metabarcoding and traditional gears	Sard, N.M., Herbst, S.J., Nathan, L., Uhrig, G., Kanefsky, J., Robinson, J.D. and Scribner, K.T.	Environmental DNA	NOV	2019	1	4	368	384
Marine water environmental DNA metabarcoding provides a comprehensive fish diversity assessment and reveals spatial patterns in a large oceanic area.	Fraija-Fernández, N., Bouquieaux, M.C., Rey, A., Mendibil, I., Cotano, U., Irigoien, X., Santos, M. and Rodríguez-Ezpeleta, N.	bioRxiv	JAN	2020					p.864710
Beyond traditional biodiversity fish monitoring: environmental DNA metabarcoding and simultaneous underwater visual census detect different sets of a complex fish community at a marine biodiversity hotspot.	Valdivia-Carrillo, T., Rocha-Olivares, A., Reyes-Bonilla, H., Domínguez-Contreras, J.F. and Munguia-Vega, A.	bioRxiv	JAN	2020					p.806729
Testing the performance of environmental DNA metabarcoding for surveying highly diverse tropical fish communities: A case study from Lake Tanganyika	Doble, C.J., Hipperson, H., Salzburger, W., Horsburgh, G.J., Mwita, C., Murrell, D.J. and Day, J.J.	Environmental DNA	Nov	2019

## Sheet: Merged without duplicates
DUPLICATES REMOVED
Count:	87
Title	Authors	Source Title	Publication Date	Publication Year	Volume	Issue	Beginning Page	Ending Page	Article Number	DOI
Environmental DNA metabarcoding with MiFish primer reveals marine fish fauna of Tsushima Island, Nagasaki for establishing a marine protected area.	Aizu, M., Seino, S., Sado, T. and Miya, M.		SEP	2017	JSFS 85th Anniversary-Commemorative International Symposium
Environmental DNA (eDNA) metabarcoding: Diversity study around the Pondok Dadap fish landing station, Malang, Indonesia.	Andriyono, S., Alam, M.J. and Kim, H.W.	Biodiversitas Journal of Biological Diversity	NOV	2019	20	12
Persistence of marine fish environmental DNA and the influence of sunlight	Andruszkiewicz, Elizabeth A.; Sassoubre, Lauren M.; Boehm, Alexandria B.	PLOS ONE	SEP 15 2017	2017	12	9			e0185043	10.1371/journal.pone.0185043
Biomonitoring of marine vertebrates in Monterey Bay using eDNA metabarcoding	Andruszkiewicz, Elizabeth A.; Starks, Hilary A.; Chavez, Francisco P.; Sassoubre, Lauren M.; Block, Barbara A.; Boehm, Alexandria B.	PLOS ONE	APR 25 2017	2017	12	4			e0176343	10.1371/journal.pone.0176343
High-throughput environmental DNA analysis informs a biological assessment of an urban stream	Bagley, Mark; Pilgrim, Erik; Knapp, Martin; Yoder, Chris; Domingo, Jorge Santo; Banerji, Aabir	ECOLOGICAL INDICATORS	SEP 2019	2019	104		378	389		10.1016/j.ecolind.2019.04.088
Environmental DNA reveals tropical shark diversity in contrasting levels of anthropogenic impact	Bakker, Judith; Wangensteen, Owen S.; Chapman, Demian D.; Boussarie, Germain; Buddo, Dayne; Guttridge, Tristan L.; Hertler, Heidi; Mouillot, David; Vigliola, Laurent; Mariani, Stefano	SCIENTIFIC REPORTS	DEC 4 2017	2017	7				16886	10.1038/s41598-017-17150-2
Environmental DNA detection of rare and invasive fish species in two Great Lakes tributaries	Balasingham, Katherine D.; Walter, Ryan P.; Mandrak, Nicholas E.; Heath, Daniel D.	MOLECULAR ECOLOGY	JAN 2018	2018	27	1	112	127		10.1111/mec.14395
Spatial and temporal dynamics of a freshwater eukaryotic plankton community revealed via 18S rRNA gene metabarcoding	Banerji, A.; Bagley, M.; Elk, M.; Pilgrim, E.; Martinson, J.; Domingo, J. Santo	HYDROBIOLOGIA	AUG 2018	2018	818	1	71	86		10.1007/s10750-018-3593-0
The effects of spatial and temporal replicate sampling on eDNA metabarcoding	Beentjes, Kevin K.; Speksnijder, Arjen G. C. L.; Schilthuizen, Menno; Hoogeveen, Marten; van der Hoorn, Berry B.	PEERJ	JUL 26 2019	2019	7				e7335	10.7717/peerj.7335
Monitoring freshwater fish communities with environmental DNA (eDNA) metabarcoding	Bylemans, J.			2018	Doctoral dissertation, University of Canberra Australia
Does Size Matter? An Experimental Evaluation of the Relative Abundance and Decay Rates of Aquatic Environmental DNA	Bylemans, Jonas; Furlan, Elise M.; Gleeson, Dianne M.; Hardy, Christopher M.; Duncan, Richard P.	ENVIRONMENTAL SCIENCE & TECHNOLOGY	JUN 5 2018	2018	52	11	6408	6416		10.1021/acs.est.8b01071
Toward an ecoregion scale evaluation of eDNA metabarcoding primers: A case study for the freshwater fish biodiversity of the Murray-Darling Basin (Australia)	Bylemans, Jonas; Gleeson, Dianne M.; Hardy, Christopher M.; Furlan, Elise	ECOLOGY AND EVOLUTION	SEP 2018	2018	8	17	8697	8712		10.1002/ece3.4387
Optimizing environmental DNA sampling effort for fish inventories in tropical streams and rivers	Cantera, Isabel; Cilleros, Kevin; Valentini, Alice; et al	SCIENTIFIC REPORTS	FEB	2019	9				3085
Unlocking biodiversity and conservation studies in high-diversity environments using environmental DNA (eDNA): A test with Guianese freshwater fishes	Cilleros, Kevin; Valentini, Alice; Allard, Luc; et al.	MOLECULAR ECOLOGY RESOURCES	JAN	2019	19	1	27	46
Spatial representativeness of environmental DNA metabarcoding signal for fish biodiversity assessment in a natural freshwater system	Civade, R., Dejean, T., Valentini, A., Roset, N., Raymond, J.C., Bonin, A., Taberlet, P. and Pont, D.	PLOS ONE	JUN	2016	11	6			e0157366
Marine Vertebrate Biodiversity and Distribution Within the Central California Current Using Environmental DNA (eDNA) Metabarcoding and Ecosystem Surveys	Closek, Collin J.; Santora, Jarrod A.; Starks, Hilary A.; Schroeder, Isaac D.; Andruszkiewicz, Elizabeth A.; Sakuma, Keith M.; Bograd, Steven J.; Hazenv, Elliott L.; Field, John C.; Boehm, Alexandria B.	FRONTIERS IN MARINE SCIENCE	DEC 16 2019	2019	6				732	10.3389/fmars.2019.00732
Non-specific amplification compromises environmental DNA metabarcoding with COI	Collins, Rupert A.; Bakker, Judith; Wangensteen, Owen S.; Soto, Ana Z.; Corrigan, Laura; Sims, David W.; Genner, Martin J.; Mariani, Stefano	METHODS IN ECOLOGY AND EVOLUTION	NOV 2019	2019	10	11	1985	2001		10.1111/2041-210X.13276
Predicting the Ecological Quality Status of Marine Environments from eDNA Metabarcoding Data Using Supervised Machine Learning	Cordier, Tristan; Esling, Philippe; Lejzerowicz, Franck; Visco, Joana; Ouadahi, Amine; Martins, Catarina; Cedhagen, Tomas; Pawlowski, Jan	ENVIRONMENTAL SCIENCE & TECHNOLOGY	AUG 15 2017	2017	51	16	9118	9126		10.1021/acs.est.7b01518
A from-benchtop-to-desktop workflow for validating HTS data and for taxonomic identification in diet metabarcoding studies	Corse, Emmanuel; Meglecz, Emese; Archambaud, Gait; Ardisson, Morgane; Martin, Jean-Francois; Tougard, Christelle; Chappaz, Remi; Dubut, Vincent	MOLECULAR ECOLOGY RESOURCES	NOV 2017	2017	17	6	e146	e159		10.1111/1755-0998.12703
Quantifying sequence proportions in a DNA-based diet study using Ion Torrent amplicon sequencing: which counts count?	Deagle, Bruce E.; Thomas, Austen C.; Shaffer, Amanda K.; Trites, Andrew W.; Jarman, Simon N.	MOLECULAR ECOLOGY RESOURCES	JUL 2013	2013	13	4	620	633		10.1111/1755-0998.12103
Long-range PCR allows sequencing of mitochondrial genomes from environmental DNA	Deiner, Kristy; Renshaw, Mark A.; Li, Yiyuan; Olds, Brett P.; Lodge, David M.; Pfrender, Michael E.	METHODS IN ECOLOGY AND EVOLUTION	DEC 2017	2017	8	12	1888	1898		10.1111/2041-210X.12836
Assessing the utility of eDNA as a tool to survey reef-fish communities in the Red Sea	DiBattista, Joseph D.; Coker, Darren J.; Sinclair-Taylor, Tane H.; Stat, Michael; Berumen, Michael L.; Bunce, Michael	CORAL REEFS	DEC 2017	2017	36	4	1245	1252		10.1007/s00338-017-1618-1
Digging for DNA at depth: rapid universal metabarcoding surveys (RUMS) as a tool to detect coral reef biodiversity across a depth gradient	DiBattista, Joseph D.; Reimer, James D.; Stat, Michael; et al.	PEERJ	FEB	2019	7				e6379
Testing the performance of environmental DNA metabarcoding for surveying highly diverse tropical fish communities: A case study from Lake Tanganyika	Doble, C.J., Hipperson, H., Salzburger, W., Horsburgh, G.J., Mwita, C., Murrell, D.J. and Day, J.J.	Environmental DNA	Nov	2019
Fish community assessment with eDNA metabarcoding: effects of sampling design and bioinformatic filtering	Evans, Nathan T.; Li, Yiyuan; Renshaw, Mark A.; Olds, Brett P.; Deiner, Kristy; Turner, Cameron R.; Jerde, Christopher L.; Lodge, David M.; Lamberti, Gary A.; Pfrender, Michael E.	CANADIAN JOURNAL OF FISHERIES AND AQUATIC SCIENCES	SEP 2017	2017	74	9	1362	1374		10.1139/cjfas-2016-0306
Quantification of mesocosm fish and amphibian species diversity via environmental DNA metabarcoding	Evans, Nathan T.; Olds, Brett P.; Renshaw, Mark A.; Turner, Cameron R.; Li, Yiyuan; Jerde, Christopher L.; Mahon, Andrew R.; Pfrender, Michael E.; Lamberti, Gary A.; Lodge, David M.	MOLECULAR ECOLOGY RESOURCES	JAN 2016	2016	16	1	29	41		10.1111/1755-0998.12433
Evaluating metabarcoding to analyse diet composition of species foraging in anthropogenic landscapes using Ion Torrent and Illumina sequencing	Forin-Wiart, Marie-Amelie; Poulle, Marie-Lazarine; Piry, Sylvain; Cosson, Jean-Francois; Larose, Claire; Galan, Maxime	SCIENTIFIC REPORTS	NOV 20 2018	2018	8				17091	10.1038/s41598-018-34430-7
Marine water environmental DNA metabarcoding provides a comprehensive fish diversity assessment and reveals spatial patterns in a large oceanic area.	Fraija-Fernández, N., Bouquieaux, M.C., Rey, A., Mendibil, I., Cotano, U., Irigoien, X., Santos, M. and Rodríguez-Ezpeleta, N.	bioRxiv	JAN	2020					p.864710
Environmental DNA metabarcoding for fish community analysis in backwater lakes: A comparison of capture methods	Fujii, Kazuya; Doi, Hideyuki; Matsuoka, Shunsuke; et al.	PLOS ONE	JAN	2019	14	1			e0210357
A case study for assessing fish traceability in Egyptian aquafeed formulations using pyrosequencing and metabarcoding	Galal-Khallaf, Asmaa; Osman, Alaa G. M.; Carleos, Carlos E.; Garcia-Vazquez, Eva; Borrell, Yaisel J.	FISHERIES RESEARCH	FEB 2016	2016	174		143	150		10.1016/j.fishres.2015.09.009
Direct fishing and eDNA metabarcoding for biomonitoring during a 3-year survey significantly improves number of fish detected around a South East Asian reservoir	Gillet, Benjamin; Cottet, Maud; Destanque, Thibault; Kue, Kaoboun; Descloux, Stephane; Chanudet, Vincent; Hughes, Sandrine	PLOS ONE	DEC 13 2018	2018	13	12			e0208592	10.1371/journal.pone.0208592
Parasitic protozoan interactions with bacterial microbiome in a tropical fish farm	Gomes, Giana Bastos; Hutson, Kate S.; Domingos, Jose A.; et al.	AQUACULTURE	MAR	2019	502		196	201
Environmental DNA metabarcoding of lake fish communities reflects long-term data from established survey methods	Hanfling, Bernd; Handley, Lori Lawson; Read, Daniel S.; Hahn, Christoph; Li, Jianlong; Nichols, Paul; Blackman, Rosetta C.; Oliver, Anna; Winfield, Ian J.	MOLECULAR ECOLOGY	JUL 2016	2016	25	13	3101	3119		10.1111/mec.13660
Responses of foraminifera communities to aquaculture-derived organic enrichment as revealed by environmental DNA metabarcoding	He, Xiaoping; Sutherland, Terri F.; Pawlowski, Jan; et al.	MOLECULAR ECOLOGY	MAR	2019	28	5	1138	1153
Environmental DNA (eDNA) metabarcoding reveals strong discrimination among diverse marine habitats connected by water movement	Jeunen, Gert-Jan; Knapp, Michael; Spencer, Hamish G.; et al.	MOLECULAR ECOLOGY RESOURCES	MAR	2019	19	2	426	438
Mixed-habitat assimilation of organic waste in coastal environments - It's all about synergy!	Keeley, Nigel; Valdemarsen, Thomas; Strohmeier, Tore; Pochon, Xavier; Dahlgren, Thomas; Bannister, Raymond	SCIENCE OF THE TOTAL ENVIRONMENT	JAN 10 2020	2020	699				134281	10.1016/j.scitotenv.2019.134281
Development and preliminary validation of a multi-trophic metabarcoding biotic index for monitoring benthic organic enrichment	Keeley, Nigel; Wood, Susanna A.; Pochon, Xavier	ECOLOGICAL INDICATORS	FEB 2018	2018	85		1044	1057		10.1016/j.ecolind.2017.11.014
Genetic and Manual Survey Methods Yield Different and Complementary Views of an Ecosystem	Kelly, Ryan P.; Closek, Collin J.; O'Donnell, James L.; Kralj, James E.; Shelton, Andrew O.; Samhouri, Jameal F.	FRONTIERS IN MARINE SCIENCE	2017	2017	3				UNSP 283	10.3389/fmars.2016.00283
Detection of rare and invasive freshwater fish species using eDNA pyrosequencirig: Lake Iznik ichthyofauna revised	Keskin, Emre; Unal, Esra Mine; Atar, Hasan Huseyin	BIOCHEMICAL SYSTEMATICS AND ECOLOGY	AUG 2016	2016	67		29	36		10.1016/j.bse.2016.05.020
Comparison of Water Sampling between Environmental DNA Metabarcoding and Conventional Microscopic Identification: A Case Study in Gwangyang Bay, South Korea	Kim, Dong-Kyun; Park, Kiyun; Jo, Hyunbin; Kwak, Ihn-Sil	APPLIED SCIENCES-BASEL	AUG 2019	2019	9	16			3272	10.3390/app9163272
Fish diversity assessment in the headwaters of the Volga River using environmental DNA metabarcoding	Lecaudey, Laurene A.; Schletterer, Martin; Kuzovlev, Vyacheslav V.; Hahn, Christoph; Weiss, Steven J.	AQUATIC CONSERVATION-MARINE AND FRESHWATER ECOSYSTEMS	OCT 2019	2019	29	10	1785	1800		10.1002/aqc.3163
High-throughput sequencing and morphology perform equally well for benthic monitoring of marine ecosystems	Lejzerowicz, Franck; Esling, Philippe; Pillet, Loic; Wilding, Thomas A.; Black, Kenneth D.; Pawlowski, Jan	SCIENTIFIC REPORTS	SEP 10 2015	2015	5				13932	10.1038/srep13932
Development of an environmental DNA method for monitoring freshwater fish communities using metabarcoding	Li, J.			2019	Doctoral dissertation, University of Hull
Limited dispersion and quick degradation of environmental DNA in fish ponds inferred by metabarcoding.	Li, J., Lawson Handley, L.J., Harper, L.R., Brys, R., Watson, H.V., Di Muri, C., Zhang, X. and Hänfling, B.	ENVIRONMENTAL DNA		2018
The effect of filtration method on the efficiency of environmental DNA capture and quantification via metabarcoding	Li, Jianlong; Handley, Lori-Jayne Lawson; Read, Daniel S.; Hanfling, Bernd	MOLECULAR ECOLOGY RESOURCES	SEP 2018	2018	18	5	1102	1114		10.1111/1755-0998.12899
Ground-truthing of a fish-based environmental DNA metabarcoding method for assessing the quality of lakes	Li, Jianlong; Hatton-Ellis, Tristan W.; Handley, Lori-Jayne Lawson; et al.	JOURNAL OF APPLIED ECOLOGY	MAY	2019	56	5	1232	1244
Estimating fish alpha-and beta-diversity along a small stream with environmental DNA metabarcoding	Li, Y., Evans, N.T., Renshaw, M.A., Jerde, C.L., Olds, B.P., Shogren, A.J., Deiner, K., Lodge, D.M., Lamberti, G.A. and Pfrender, M.E.	METABARCODING AND METAGENOMICS		2018	2				e24262
Investigating diversity of pathogenic microbes in commercial bait trade water	Mahon, Andrew R.; Horton, Dean J.; Learman, Deric R.; Nathan, Lucas R.; Jerde, Christopher L.	PEERJ	AUG 23 2018	2018	6				e5468	10.7717/peerj.5468
Metabarcoding by capture using a single COI probe (MCSP) to identify and quantify fish species in ichthyoplankton swarms	Mariac, C.; Vigouroux, Y.; Duponchelle, F.; Garcia-Davila, C.; Nunez, J.; Desmarais, E.; Renno, J. F.	PLOS ONE	SEP 12 2018	2018	13	9			e0202976	10.1371/journal.pone.0202976
Environmental DNA metabarcoding as an effective and rapid tool for fish monitoring in canals	McDevitt, Allan D.; Sales, Naiara Guimaraes; Browett, Samuel S.; Sparnenn, Abbie O.; Mariani, Stefano; Wangensteen, Owen S.; Coscia, Ilaria; Benvenuto, Chiara	JOURNAL OF FISH BIOLOGY	AUG 2019	2019	95	2	679	682		10.1111/jfb.14053
More (or less?) bounce for the ounce: a comparison of environmental DNA and classical approaches for bioassessment	McInerney, Paul J.; Rees, Gavin N.	MARINE AND FRESHWATER RESEARCH	2018	2018	69	6	992	996		10.1071/MF17250
Seasonal dynamics of riverine fish communities using eDNA	Milhau, Tristan; Valentini, Alice; Poulet, Nicolas; Roset, Nicolas; Jean, Pauline; Gaboriaud, Coline; Dejean, Tony	JOURNAL OF FISH BIOLOGY		2019						10.1111/jfb.14190
MiFish, a set of universal PCR primers for metabarcoding environmental DNA from fishes: detection of more than 230 subtropical marine species	Miya, M.; Sato, Y.; Fukunaga, T.; Sado, T.; Poulsen, J. Y.; Sato, K.; Minamoto, T.; Yamamoto, S.; Yamanaka, H.; Araki, H.; Kondoh, M.; Iwasaki, W.	ROYAL SOCIETY OPEN SCIENCE	JUL 2015	2015	2	7			150088	10.1098/rsos.150088
Use of a Filter Cartridge for Filtration of Water Samples and Extraction of Environmental DNA	Miya, Masaki; Minamoto, Toshifumi; Yamanaka, Hiroki; Oka, Shin-ichiro; Sato, Keiichi; Yamamoto, Satoshi; Sado, Tetsuya; Doi, Hideyuki	JOVE-JOURNAL OF VISUALIZED EXPERIMENTS	NOV 2016	2016		117			e54741	10.3791/54741
Comparing local- and regional-scale estimations of the diversity of stream fish using eDNA metabarcoding and conventional observation methods	Nakagawa, Hikaru; Yamamoto, Satoshi; Sato, Yukuto; Sado, Tetsuya; Minamoto, Toshifumi; Miya, Masaki	FRESHWATER BIOLOGY	JUN 2018	2018	63	6	569	580		10.1111/fwb.13094
Estimating species richness using environmental DNA	Olds, Brett P.; Jerde, Christopher L.; Renshaw, Mark A.; Li, Yiyuan; Evans, Nathan T.; Turner, Cameron R.; Deiner, Kristy; Mahon, Andrew R.; Brueseke, Michael A.; Shirey, Patrick D.; Pfrender, Michael E.; Lodge, David M.; Lamberti, Gary A.	ECOLOGY AND EVOLUTION	JUN 2016	2016	6	12	4214	4226		10.1002/ece3.2186
Environmental monitoring through protist next-generation sequencing metabarcoding: assessing the impact of fish farming on benthic foraminifera communities	Pawlowski, Jan; Esling, Philippe; Lejzerowicz, Franck; Cedhagen, Tomas; Wilding, Thomas A.	MOLECULAR ECOLOGY RESOURCES	NOV 2014	2014	14	6	1129	1140		10.1111/1755-0998.12261
Benthic monitoring of salmon farms in Norway using foraminiferal metabarcoding	Pawlowski, Jan; Esling, Philippe; Lejzerowicz, Franck; Cordier, Tristan; Visco, Joana A.; Martins, Catarina I. M.; Kvalvik, Arne; Staven, Knut; Cedhagen, Tomas	AQUACULTURE ENVIRONMENT INTERACTIONS	2016	2016	8		371	386		10.3354/aei00182
Accurate assessment of the impact of salmon farming on benthic sediment enrichment using foraminiferal metabarcoding	Pochon, X.; Wood, S. A.; Keeley, N. B.; Lejzerowicz, F.; Esling, P.; Drew, J.; Pawlowski, J.	MARINE POLLUTION BULLETIN	NOV 15 2015	2015	100	1	370	382		10.1016/j.marpolbul.2015.08.022
Environmental DNA reveals quantitative patterns of fish biodiversity in large rivers despite its downstream transportation	Pont, Didier; Rocle, Mathieu; Valentini, Alice; Civade, Raphael; Jean, Pauline; Maire, Anthony; Roset, Nicolas; Schabuss, Michael; Zornig, Horst; Dejean, Tony	SCIENTIFIC REPORTS	JUL 10 2018	2018	8				10361	10.1038/s41598-018-28424-8
The future of fish-based ecological assessment of European rivers: from traditional EU Water Framework Directive compliant methods to eDNA metabarcoding-based approaches	Pont, Didier; Valentini, Alice; Rocle, Mathieu; Maire, Anthony; Delaigue, Olivier; Jean, Pauline; Dejean, Tony	JOURNAL OF FISH BIOLOGY		2019						10.1111/jfb.14176
Assessing vertebrate biodiversity in a kelp forest ecosystem using environmental DNA	Port, Jesse A.; O'Donnell, James L.; Romero-Maraccini, Ofelia C.; Leary, Paul R.; Litvin, Steven Y.; Nickols, Kerry J.; Yamahara, Kevan M.; Kelly, Ryan P.	MOLECULAR ECOLOGY	JAN 2016	2016	25	2	527	541		10.1111/mec.13481
Comparison of fish detections, community diversity, and relative abundance using environmental DNA metabarcoding and traditional gears	Sard, N.M., Herbst, S.J., Nathan, L., Uhrig, G., Kanefsky, J., Robinson, J.D. and Scribner, K.T.	Environmental DNA	NOV	2019	1	4	368	384
Usefulness and limitations of sample pooling for environmental DNA metabarcoding of freshwater fish communities	Sato, Hirotoshi; Sogo, Yuki; Doi, Hideyuki; Yamanaka, Hiroki	SCIENTIFIC REPORTS	NOV 1 2017	2017	7				14860	10.1038/s41598-017-14978-6
MitoFish and MiFish pipeline: a mitochondrial genome database of fish with an analysis pipeline for environmental DNA metabarcoding	Sato, Y., Miya, M., Fukunaga, T., Sado, T. and Iwasaki, W.	MOLECULAR BIOLOGY AND EVOLUTION	JUN	2018	35	6	1553	1555
Comparison of environmental DNA metabarcoding and conventional fish survey methods in a river system	Shaw, Jennifer L. A.; Clarke, Laurence J.; Wedderburn, Scotte D.; Barnes, Thomas C.; Weyrich, Laura S.; Cooper, Alan	BIOLOGICAL CONSERVATION	MAY 2016	2016	197		131	138		10.1016/j.biocon.2016.03.010
DNA metabarcoding unveils multiscale trophic variation in a widespread coastal opportunist	Siegenthaler, Andjin; Wangensteen, Owen S.; Benvenuto, Chiara; et al.	MOLECULAR ECOLOGY	JAN	2019	28	2	232	249
Metabarcoding of shrimp stomach content: Harnessing a natural sampler for fish biodiversity monitoring	Siegenthaler, Andjin; Wangensteen, Owen S.; Soto, Ana Z.; et al.	MOLECULAR ECOLOGY RESOURCES	JAN	2019	19	1	206	220
Seawater environmental DNA reflects seasonality of a coastal fish community	Sigsgaard, Eva Egelyng; Nielsen, Ida Broman; Carl, Henrik; Krag, Marcus Anders; Knudsen, Steen Wilhelm; Xing, Yingchun; Holm-Hansen, Tore Hejl; Moller, Peter Rask; Thomsen, Philip Francis	MARINE BIOLOGY	JUN 2017	2017	164	6			128	10.1007/s00227-017-3147-4
Comprehensive biodiversity analysis via ultra-deep patterned flow cell technology: a case study of eDNA metabarcoding seawater	Singer, G. A. C.; Fahner, N. A.; Barnes, J. G.; et al.	SCIENTIFIC REPORTS	APR	2019	9				5991
Ecosystem biomonitoring with eDNA: metabarcoding across the tree of life in a tropical marine environment	Stat, Michael; Huggett, Megan J.; Bernasconi, Rachele; DiBattista, Joseph D.; Berry, Tina E.; Newman, Stephen J.; Harvey, Euan S.; Bunce, Michael	SCIENTIFIC REPORTS	SEP 25 2017	2017	7				12240	10.1038/s41598-017-12501-5
Combined use of eDNA metabarcoding and video surveillance for the assessment of fish biodiversity	Stat, Michael; John, Jeffrey; DiBattista, Joseph D.; et al.	CONSERVATION BIOLOGY		2018	0	0	1	10		10.1111/cobi.13183									0	0	0	0	0	0	0	0	0	0	0	0	0	0	0
GoFish: A versatile nested PCR strategy for environmental DNA assays for marine vertebrates	Stoeckle, Mark Y.; Das Mishu, Mithun; Charlop-Powers, Zachary	PLOS ONE	DEC 11 2018	2018	13	12			e0198717	10.1371/journal.pone.0198717									0	0	0	0	0	0	0	0	0	0	0	0	0	0	0
Quantitative DNA metabarcoding: improved estimates of species proportional biomass using correction factors derived from control material	Thomas, Austen C.; Deagle, Bruce E.; Eveson, J. Paige; Harsch, Corie H.; Trites, Andrew W.	MOLECULAR ECOLOGY RESOURCES	MAY 2016	2016	16	3	714	726		10.1111/1755-0998.12490									0	0	0	0	0	0	0	0	0	0	0	0	0	0	0
Detection of a Diverse Marine Fish Fauna Using Environmental DNA from Seawater Samples	Thomsen, Philip Francis; Kielgast, Jos; Iversen, Lars Lonsmann; Moller, Peter Rask; Rasmussen, Morten; Willerslev, Eske	PLOS ONE	AUG 29 2012	2012	7	8			e41732	10.1371/journal.pone.0041732									1	0.5	0	0	0	0	0	0	0	0	0	0	0	1	0
Environmental DNA from Seawater Samples Correlate with Trawl Catches of Subarctic, Deepwater Fishes	Thomsen, Philip Francis; Moller, Peter Rask; Sigsgaard, Eva Egelyng; Knudsen, Steen Wilhelm; Jorgensen, Ole Ankjaer; Willerslev, Eske	PLOS ONE	NOV 16 2016	2016	11	11			e0165252	10.1371/journal.pone.0165252									0	0	0	0	0	0	0	0	0	0	0	0	0	0	0
Real-time multiplex PCR for simultaneous detection of multiple species from environmental DNA: an application on two Japanese medaka species	Tsuji, Satsuki; Iguchi, Yuka; Shibata, Naoki; Teramura, Iori; Kitagawa, Tadao; Yamanaka, Hiroki	SCIENTIFIC REPORTS	JUN 14 2018	2018	8				9138	10.1038/s41598-018-27434-w									0	0	0	0	0	0	0	0	0	0	0	0	0	0	0
Environmental DNA enables detection of terrestrial mammals from forest pond water	Ushio, Masayuki; Fukuda, Hisato; Inoue, Toshiki; Makoto, Kobayashi; Kishida, Osamu; Sato, Keiichi; Murata, Koichi; Nikaido, Masato; Sado, Tetsuya; Sato, Yukuto; Takeshita, Masamichi; Iwasaki, Wataru; Yamanaka, Hiroki; Kondoh, Michio; Miya, Masaki	MOLECULAR ECOLOGY RESOURCES	NOV 2017	2017	17	6	e63	e75		10.1111/1755-0998.12690									3	1.5	0	0	0	0	0	0	0	0	0	0	0	3	0
Demonstration of the potential of environmental DNA as a tool for the detection of avian species	Ushio, Masayuki; Murata, Koichi; Sado, Tetsuya; Nishiumi, Isao; Takeshita, Masamichi; Iwasaki, Wataru; Miya, Masaki	SCIENTIFIC REPORTS	MAR 14 2018	2018	8				4493	10.1038/s41598-018-22817-5									0	0	0	0	0	0	0	0	0	0	0	0	0	0	0
Beyond traditional biodiversity fish monitoring: environmental DNA metabarcoding and simultaneous underwater visual census detect different sets of a complex fish community at a marine biodiversity hotspot.	Valdivia-Carrillo, T., Rocha-Olivares, A., Reyes-Bonilla, H., Domínguez-Contreras, J.F. and Munguia-Vega, A.	bioRxiv	JAN	2020					p.806729										0	0	0	0	0	0	0	0	0	0	0	0	0	0	0
Next-generation monitoring of aquatic biodiversity using environmental DNA metabarcoding	Valentini, Alice; Taberlet, Pierre; Miaud, Claude; Civade, Raphael; Herder, Jelger; Thomsen, Philip Francis; Bellemain, Eva; Besnard, Aurelien; Coissac, Eric; Boyer, Frederic; Gaboriaud, Coline; Jean, Pauline; Poulet, Nicolas; Roset, Nicolas; Copp, Gordon H.; Geniez, Philippe; Pont, Didier; Argillier, Christine; Baudoin, Jean-Marc; Peroux, Tiphaine; Crivelli, Alain J.; Olivier, Anthony; Acqueberg…	MOLECULAR ECOLOGY	FEB 2016	2016	25	4	929	942		10.1111/mec.13428									0	0	0	0	0	0	0	0	0	0	0	0	0	0	0
Freshwater vertebrate metabarcoding on Illumina platforms using double-indexed primers of the mitochondrial 16S rRNA gene	Vences, Miguel; Lyra, Mariana L.; Perl, R. G. Bina; Bletz, Molly C.; Stankovic, David; Lopes, Carla Martins; Jarek, Michael; Bhuju, Sabin; Geffers, Robert; Haddad, Celio F. B.; Steinfartz, Sebastian	CONSERVATION GENETICS RESOURCES	SEP 2016	2016	8	3	323	327		10.1007/s12686-016-0550-y									0	0	0	0	0	0	0	0	0	0	0	0	0	0	0
Linking Environmental DNA and RNA for Improved Detection of the Marine Invasive Fanworm Sabella spallanzanii	von Ammon, Ulla; Wood, Susanna A.; Laroche, Olivier; Zaiko, Anastasija; Lavery, Shane D.; Inglis, Graeme J.; Pochon, Xavier	FRONTIERS IN MARINE SCIENCE	OCT 15 2019	2019	6				621	10.3389/fmars.2019.00621
Environmental DNA metabarcoding reveals local fish communities in a species-rich coastal sea	Yamamoto, Satoshi; Masuda, Reiji; Sato, Yukuto; Sado, Tetsuya; Araki, Hitoshi; Kondoh, Michio; Minamoto, Toshifumi; Miya, Masaki	SCIENTIFIC REPORTS	JAN 12 2017	2017	7				40368	10.1038/srep40368
Metabarcoding approach for the ballast water surveillance - An advantageous solution or an awkward challenge?	Zaiko, Anastasija; Martinez, Jose L.; Schmidt-Petersen, Julia; Ribicic, Deni; Samuiloviene, Aurelija; Garcia-Vazquez, Eva	MARINE POLLUTION BULLETIN	MAR 15 2015	2015	92	1-2	25	34		10.1016/j.marpolbul.2015.01.008
Assessment of fish communities using environmental DNA: Effect of spatial sampling design in lentic systems of different sizes	Zhang, Shan; Lu, Qi; Wang, Yiyan; Wang, Xiaomei; Zhao, Jindong; Yao, Meng	MOLECULAR ECOLOGY RESOURCES	JAN 2020	2020	20	1	242	255		10.1111/1755-0998.13105
eDNA metabarcoding as a promising conservation tool for monitoring fish diversity in a coastal wetland of the Pearl River Estuary compared to bottom trawling	Zou, Keshu; Chen, Jianwei; Ruan, Huiting; Li, Zhenhai; Guo, Wenjie; Li, Min; Liu, Li	SCIENCE OF THE TOTAL ENVIRONMENT	FEB 1 2020	2020	702				UNSP 134704	10.1016/j.scitotenv.2019.134704

## Sheet: Rejected records
REJECTED RECORDS
					Count:	61
Rationale:
1	2	3	4	5	Title	Authors	Source Title	Publication Date	Publication Year	Volume	Issue	Beginning Page	Ending Page	Article Number	DOI
		x		x	Environmental DNA metabarcoding with MiFish primer reveals marine fish fauna of Tsushima Island, Nagasaki for establishing a marine protected area.	Aizu, M., Seino, S., Sado, T. and Miya, M.		SEP	2017	JSFS 85th Anniversary-Commemorative International Symposium
x	x				Persistence of marine fish environmental DNA and the influence of sunlight	Andruszkiewicz, Elizabeth A.; Sassoubre, Lauren M.; Boehm, Alexandria B.	PLOS ONE	SEP 15 2017	2017	12	9			e0185043	10.1371/journal.pone.0185043
		x			Biomonitoring of marine vertebrates in Monterey Bay using eDNA metabarcoding	Andruszkiewicz, Elizabeth A.; Starks, Hilary A.; Chavez, Francisco P.; Sassoubre, Lauren M.; Block, Barbara A.; Boehm, Alexandria B.	PLOS ONE	APR 25 2017	2017	12	4			e0176343	10.1371/journal.pone.0176343
x			x		High-throughput environmental DNA analysis informs a biological assessment of an urban stream	Bagley, Mark; Pilgrim, Erik; Knapp, Martin; et al.	ECOLOGICAL INDICATORS	SEP	2019	104		378	389
			x		Environmental DNA reveals tropical shark diversity in contrasting levels of anthropogenic impact	Bakker, Judith; Wangensteen, Owen S.; Chapman, Demian D.; Boussarie, Germain; Buddo, Dayne; Guttridge, Tristan L.; Hertler, Heidi; Mouillot, David; Vigliola, Laurent; Mariani, Stefano	SCIENTIFIC REPORTS	DEC 4 2017	2017	7				16886	10.1038/s41598-017-17150-2
			x		Spatial and temporal dynamics of a freshwater eukaryotic plankton community revealed via 18S rRNA gene metabarcoding	Banerji, A.; Bagley, M.; Elk, M.; Pilgrim, E.; Martinson, J.; Domingo, J. Santo	HYDROBIOLOGIA	AUG 2018	2018	818	1	71	86		10.1007/s10750-018-3593-0
		x		x	Monitoring freshwater fish communities with environmental DNA (eDNA) metabarcoding	Bylemans, J.			2018	Doctoral dissertation, University of Canberra Australia
			x		Does Size Matter? An Experimental Evaluation of the Relative Abundance and Decay Rates of Aquatic Environmental DNA	Bylemans, Jonas; Furlan, Elise M.; Gleeson, Dianne M.; Hardy, Christopher M.; Duncan, Richard P.	ENVIRONMENTAL SCIENCE & TECHNOLOGY	JUN 5 2018	2018	52	11	6408	6416		10.1021/acs.est.8b01071
		x			Toward an ecoregion scale evaluation of eDNA metabarcoding primers: A case study for the freshwater fish biodiversity of the Murray-Darling Basin (Australia)	Bylemans, Jonas; Gleeson, Dianne M.; Hardy, Christopher M.; Furlan, Elise	ECOLOGY AND EVOLUTION	SEP 2018	2018	8	17	8697	8712		10.1002/ece3.4387
					Optimizing environmental DNA sampling effort for fish inventories in tropical streams and rivers	Cantera, Isabel; Cilleros, Kevin; Valentini, Alice; et al	SCIENTIFIC REPORTS	FEB	2019	9				3085
		x	x		Predicting the Ecological Quality Status of Marine Environments from eDNA Metabarcoding Data Using Supervised Machine Learning	Cordier, Tristan; Esling, Philippe; Lejzerowicz, Franck; Visco, Joana; Ouadahi, Amine; Martins, Catarina; Cedhagen, Tomas; Pawlowski, Jan	ENVIRONMENTAL SCIENCE & TECHNOLOGY	AUG 15 2017	2017	51	16	9118	9126		10.1021/acs.est.7b01518
x		x	x		A from-benchtop-to-desktop workflow for validating HTS data and for taxonomic identification in diet metabarcoding studies	Corse, Emmanuel; Meglecz, Emese; Archambaud, Gait; Ardisson, Morgane; Martin, Jean-Francois; Tougard, Christelle; Chappaz, Remi; Dubut, Vincent	MOLECULAR ECOLOGY RESOURCES	NOV 2017	2017	17	6	e146	e159		10.1111/1755-0998.12703
x		x	x		Quantifying sequence proportions in a DNA-based diet study using Ion Torrent amplicon sequencing: which counts count?	Deagle, Bruce E.; Thomas, Austen C.; Shaffer, Amanda K.; Trites, Andrew W.; Jarman, Simon N.	MOLECULAR ECOLOGY RESOURCES	JUL 2013	2013	13	4	620	633		10.1111/1755-0998.12103
x		x			Long-range PCR allows sequencing of mitochondrial genomes from environmental DNA	Deiner, Kristy; Renshaw, Mark A.; Li, Yiyuan; Olds, Brett P.; Lodge, David M.; Pfrender, Michael E.	METHODS IN ECOLOGY AND EVOLUTION	DEC 2017	2017	8	12	1888	1898		10.1111/2041-210X.12836
x			x		Digging for DNA at depth: rapid universal metabarcoding surveys (RUMS) as a tool to detect coral reef biodiversity across a depth gradient	DiBattista, Joseph D.; Reimer, James D.; Stat, Michael; et al.	PEERJ	FEB	2019	7				e6379
x					Quantification of mesocosm fish and amphibian species diversity via environmental DNA metabarcoding	Evans, Nathan T.; Olds, Brett P.; Renshaw, Mark A.; Turner, Cameron R.; Li, Yiyuan; Jerde, Christopher L.; Mahon, Andrew R.; Pfrender, Michael E.; Lamberti, Gary A.; Lodge, David M.	MOLECULAR ECOLOGY RESOURCES	JAN 2016	2016	16	1	29	41		10.1111/1755-0998.12433
x		x	x		Evaluating metabarcoding to analyse diet composition of species foraging in anthropogenic landscapes using Ion Torrent and Illumina sequencing	Forin-Wiart, Marie-Amelie; Poulle, Marie-Lazarine; Piry, Sylvain; Cosson, Jean-Francois; Larose, Claire; Galan, Maxime	SCIENTIFIC REPORTS	NOV 20 2018	2018	8				17091	10.1038/s41598-018-34430-7
x		x			A case study for assessing fish traceability in Egyptian aquafeed formulations using pyrosequencing and metabarcoding	Galal-Khallaf, Asmaa; Osman, Alaa G. M.; Carleos, Carlos E.; Garcia-Vazquez, Eva; Borrell, Yaisel J.	FISHERIES RESEARCH	FEB 2016	2016	174		143	150		10.1016/j.fishres.2015.09.009
x		x	x		Parasitic protozoan interactions with bacterial microbiome in a tropical fish farm	Gomes, Giana Bastos; Hutson, Kate S.; Domingos, Jose A.; et al.	AQUACULTURE	MAR	2019	502		196	201
x		x	x		Responses of foraminifera communities to aquaculture-derived organic enrichment as revealed by environmental DNA metabarcoding	He, Xiaoping; Sutherland, Terri F.; Pawlowski, Jan; et al.	MOLECULAR ECOLOGY	MAR	2019	28	5	1138	1153
			x		Environmental DNA (eDNA) metabarcoding reveals strong discrimination among diverse marine habitats connected by water movement	Jeunen, Gert-Jan; Knapp, Michael; Spencer, Hamish G.; et al.	MOLECULAR ECOLOGY RESOURCES	MAR	2019	19	2	426	438
			x		Development and preliminary validation of a multi-trophic metabarcoding biotic index for monitoring benthic organic enrichment	Keeley, Nigel; Wood, Susanna A.; Pochon, Xavier	ECOLOGICAL INDICATORS	FEB 2018	2018	85		1044	1057		10.1016/j.ecolind.2017.11.014
			x		Genetic and Manual Survey Methods Yield Different and Complementary Views of an Ecosystem	Kelly, Ryan P.; Closek, Collin J.; O'Donnell, James L.; Kralj, James E.; Shelton, Andrew O.; Samhouri, Jameal F.	FRONTIERS IN MARINE SCIENCE	2017	2017	3				UNSP 283	10.3389/fmars.2016.00283
x			x		High-throughput sequencing and morphology perform equally well for benthic monitoring of marine ecosystems	Lejzerowicz, Franck; Esling, Philippe; Pillet, Loic; Wilding, Thomas A.; Black, Kenneth D.; Pawlowski, Jan	SCIENTIFIC REPORTS	SEP 10 2015	2015	5				13932	10.1038/srep13932
x					Limited dispersion and quick degradation of environmental DNA in fish ponds inferred by metabarcoding.	Li, J., Lawson Handley, L.J., Harper, L.R., Brys, R., Watson, H.V., Di Muri, C., Zhang, X. and Hänfling, B.	ENVIRONMENTAL DNA		2018
x		x			The effect of filtration method on the efficiency of environmental DNA capture and quantification via metabarcoding	Li, Jianlong; Handley, Lori-Jayne Lawson; Read, Daniel S.; Hanfling, Bernd	MOLECULAR ECOLOGY RESOURCES	SEP 2018	2018	18	5	1102	1114		10.1111/1755-0998.12899
					Ground-truthing of a fish-based environmental DNA metabarcoding method for assessing the quality of lakes	Li, Jianlong; Hatton-Ellis, Tristan W.; Handley, Lori-Jayne Lawson; et al.	JOURNAL OF APPLIED ECOLOGY	MAY	2019	56	5	1232	1244
		x			Estimating fish alpha-and beta-diversity along a small stream with environmental DNA metabarcoding	Li, Y., Evans, N.T., Renshaw, M.A., Jerde, C.L., Olds, B.P., Shogren, A.J., Deiner, K., Lodge, D.M., Lamberti, G.A. and Pfrender, M.E.	METABARCODING AND METAGENOMICS		2018	2				e24262
x		x	x		Investigating diversity of pathogenic microbes in commercial bait trade water	Mahon, Andrew R.; Horton, Dean J.; Learman, Deric R.; Nathan, Lucas R.; Jerde, Christopher L.	PEERJ	AUG 23 2018	2018	6				e5468	10.7717/peerj.5468
		x	x		Metabarcoding by capture using a single COI probe (MCSP) to identify and quantify fish species in ichthyoplankton swarms	Mariac, C.; Vigouroux, Y.; Duponchelle, F.; Garcia-Davila, C.; Nunez, J.; Desmarais, E.; Renno, J. F.	PLOS ONE	SEP 12 2018	2018	13	9			e0202976	10.1371/journal.pone.0202976
			x		More (or less?) bounce for the ounce: a comparison of environmental DNA and classical approaches for bioassessment	McInerney, Paul J.; Rees, Gavin N.	MARINE AND FRESHWATER RESEARCH	2018	2018	69	6	992	996		10.1071/MF17250
		x			MiFish, a set of universal PCR primers for metabarcoding environmental DNA from fishes: detection of more than 230 subtropical marine species	Miya, M.; Sato, Y.; Fukunaga, T.; Sado, T.; Poulsen, J. Y.; Sato, K.; Minamoto, T.; Yamamoto, S.; Yamanaka, H.; Araki, H.; Kondoh, M.; Iwasaki, W.	ROYAL SOCIETY OPEN SCIENCE	JUL 2015	2015	2	7			150088	10.1098/rsos.150088
x					Use of a Filter Cartridge for Filtration of Water Samples and Extraction of Environmental DNA	Miya, Masaki; Minamoto, Toshifumi; Yamanaka, Hiroki; Oka, Shin-ichiro; Sato, Keiichi; Yamamoto, Satoshi; Sado, Tetsuya; Doi, Hideyuki	JOVE-JOURNAL OF VISUALIZED EXPERIMENTS	NOV 2016	2016		117			e54741	10.3791/54741
x			x		Environmental monitoring through protist next-generation sequencing metabarcoding: assessing the impact of fish farming on benthic foraminifera communities	Pawlowski, Jan; Esling, Philippe; Lejzerowicz, Franck; Cedhagen, Tomas; Wilding, Thomas A.	MOLECULAR ECOLOGY RESOURCES	NOV 2014	2014	14	6	1129	1140		10.1111/1755-0998.12261
x			x		Benthic monitoring of salmon farms in Norway using foraminiferal metabarcoding	Pawlowski, Jan; Esling, Philippe; Lejzerowicz, Franck; Cordier, Tristan; Visco, Joana A.; Martins, Catarina I. M.; Kvalvik, Arne; Staven, Knut; Cedhagen, Tomas	AQUACULTURE ENVIRONMENT INTERACTIONS	2016	2016	8		371	386		10.3354/aei00182
x			x		Accurate assessment of the impact of salmon farming on benthic sediment enrichment using foraminiferal metabarcoding	Pochon, X.; Wood, S. A.; Keeley, N. B.; Lejzerowicz, F.; Esling, P.; Drew, J.; Pawlowski, J.	MARINE POLLUTION BULLETIN	NOV 15 2015	2015	100	1	370	382		10.1016/j.marpolbul.2015.08.022
			x		Assessing vertebrate biodiversity in a kelp forest ecosystem using environmental DNA	Port, Jesse A.; O'Donnell, James L.; Romero-Maraccini, Ofelia C.; Leary, Paul R.; Litvin, Steven Y.; Nickols, Kerry J.; Yamahara, Kevan M.; Kelly, Ryan P.	MOLECULAR ECOLOGY	JAN 2016	2016	25	2	527	541		10.1111/mec.13481
		x			Usefulness and limitations of sample pooling for environmental DNA metabarcoding of freshwater fish communities	Sato, Hirotoshi; Sogo, Yuki; Doi, Hideyuki; Yamanaka, Hiroki	SCIENTIFIC REPORTS	NOV 1 2017	2017	7				14860	10.1038/s41598-017-14978-6
		x			MitoFish and MiFish pipeline: a mitochondrial genome database of fish with an analysis pipeline for environmental DNA metabarcoding	Sato, Y., Miya, M., Fukunaga, T., Sado, T. and Iwasaki, W.	MOLECULAR BIOLOGY AND EVOLUTION	JUN	2018	35	6	1553	1555
x		x	x		DNA metabarcoding unveils multiscale trophic variation in a widespread coastal opportunist	Siegenthaler, Andjin; Wangensteen, Owen S.; Benvenuto, Chiara; et al.	MOLECULAR ECOLOGY	JAN	2019	28	2	232	249
x					Metabarcoding of shrimp stomach content: Harnessing a natural sampler for fish biodiversity monitoring	Siegenthaler, Andjin; Wangensteen, Owen S.; Soto, Ana Z.; et al.	MOLECULAR ECOLOGY RESOURCES	JAN	2019	19	1	206	220
		x	x		Comprehensive biodiversity analysis via ultra-deep patterned flow cell technology: a case study of eDNA metabarcoding seawater	Singer, G. A. C.; Fahner, N. A.; Barnes, J. G.; et al.	SCIENTIFIC REPORTS	APR	2019	9				5991
		x	x		Ecosystem biomonitoring with eDNA: metabarcoding across the tree of life in a tropical marine environment	Stat, Michael; Huggett, Megan J.; Bernasconi, Rachele; DiBattista, Joseph D.; Berry, Tina E.; Newman, Stephen J.; Harvey, Euan S.; Bunce, Michael	SCIENTIFIC REPORTS	SEP 25 2017	2017	7				12240	10.1038/s41598-017-12501-5
		x			GoFish: A versatile nested PCR strategy for environmental DNA assays for marine vertebrates	Stoeckle, Mark Y.; Das Mishu, Mithun; Charlop-Powers, Zachary	PLOS ONE	DEC 11 2018	2018	13	12			e0198717	10.1371/journal.pone.0198717
x		x	x		Quantitative DNA metabarcoding: improved estimates of species proportional biomass using correction factors derived from control material	Thomas, Austen C.; Deagle, Bruce E.; Eveson, J. Paige; Harsch, Corie H.; Trites, Andrew W.	MOLECULAR ECOLOGY RESOURCES	MAY 2016	2016	16	3	714	726		10.1111/1755-0998.12490
	x		x		Real-time multiplex PCR for simultaneous detection of multiple species from environmental DNA: an application on two Japanese medaka species	Tsuji, Satsuki; Iguchi, Yuka; Shibata, Naoki; Teramura, Iori; Kitagawa, Tadao; Yamanaka, Hiroki	SCIENTIFIC REPORTS	JUN 14 2018	2018	8				9138	10.1038/s41598-018-27434-w
		x	x		Environmental DNA enables detection of terrestrial mammals from forest pond water	Ushio, Masayuki; Fukuda, Hisato; Inoue, Toshiki; Makoto, Kobayashi; Kishida, Osamu; Sato, Keiichi; Murata, Koichi; Nikaido, Masato; Sado, Tetsuya; Sato, Yukuto; Takeshita, Masamichi; Iwasaki, Wataru; Yamanaka, Hiroki; Kondoh, Michio; Miya, Masaki	MOLECULAR ECOLOGY RESOURCES	NOV 2017	2017	17	6	e63	e75		10.1111/1755-0998.12690
		x	x		Demonstration of the potential of environmental DNA as a tool for the detection of avian species	Ushio, Masayuki; Murata, Koichi; Sado, Tetsuya; Nishiumi, Isao; Takeshita, Masamichi; Iwasaki, Wataru; Miya, Masaki	SCIENTIFIC REPORTS	MAR 14 2018	2018	8				4493	10.1038/s41598-018-22817-5
		x			Freshwater vertebrate metabarcoding on Illumina platforms using double-indexed primers of the mitochondrial 16S rRNA gene	Vences, Miguel; Lyra, Mariana L.; Perl, R. G. Bina; Bletz, Molly C.; Stankovic, David; Lopes, Carla Martins; Jarek, Michael; Bhuju, Sabin; Geffers, Robert; Haddad, Celio F. B.; Steinfartz, Sebastian	CONSERVATION GENETICS RESOURCES	SEP 2016	2016	8	3	323	327		10.1007/s12686-016-0550-y
			x		Metabarcoding approach for the ballast water surveillance - An advantageous solution or an awkward challenge?	Zaiko, Anastasija; Martinez, Jose L.; Schmidt-Petersen, Julia; Ribicic, Deni; Samuiloviene, Aurelija; Garcia-Vazquez, Eva	MARINE POLLUTION BULLETIN	MAR 15 2015	2015	92	1-2	25	34		10.1016/j.marpolbul.2015.01.008
		x			Environmental DNA (eDNA) metabarcoding: Diversity study around the Pondok Dadap fish landing station, Malang, Indonesia.	Andriyono, S., Alam, M.J. and Kim, H.W.	Biodiversitas Journal of Biological Diversity	NOV	2019	20	12
		x	x		The effects of spatial and temporal replicate sampling on eDNA metabarcoding	Beentjes, Kevin K.; Speksnijder, Arjen G. C. L.; Schilthuizen, Menno; Hoogeveen, Marten; van der Hoorn, Berry B.	PEERJ	JUL 26 2019	2019	7				e7335	10.7717/peerj.7335
				x	Marine water environmental DNA metabarcoding provides a comprehensive fish diversity assessment and reveals spatial patterns in a large oceanic area.	Fraija-Fernández, N., Bouquieaux, M.C., Rey, A., Mendibil, I., Cotano, U., Irigoien, X., Santos, M. and Rodríguez-Ezpeleta, N.	bioRxiv	JAN	2020					p.864710
			x		Mixed-habitat assimilation of organic waste in coastal environments - It's all about synergy!	Keeley, Nigel; Valdemarsen, Thomas; Strohmeier, Tore; Pochon, Xavier; Dahlgren, Thomas; Bannister, Raymond	SCIENCE OF THE TOTAL ENVIRONMENT	JAN 10 2020	2020	699				134281	10.1016/j.scitotenv.2019.134281
			x		Comparison of Water Sampling between Environmental DNA Metabarcoding and Conventional Microscopic Identification: A Case Study in Gwangyang Bay, South Korea	Kim, Dong-Kyun; Park, Kiyun; Jo, Hyunbin; Kwak, Ihn-Sil	APPLIED SCIENCES-BASEL	AUG 2019	2019	9	16			3272	10.3390/app9163272
				x	Development of an environmental DNA method for monitoring freshwater fish communities using metabarcoding	Li, J.			2019	Doctoral dissertation, University of Hull
		x			Seasonal dynamics of riverine fish communities using eDNA	Milhau, Tristan; Valentini, Alice; Poulet, Nicolas; Roset, Nicolas; Jean, Pauline; Gaboriaud, Coline; Dejean, Tony	JOURNAL OF FISH BIOLOGY		2019						10.1111/jfb.14190
x					The future of fish-based ecological assessment of European rivers: from traditional EU Water Framework Directive compliant methods to eDNA metabarcoding-based approaches	Pont, Didier; Valentini, Alice; Rocle, Mathieu; Maire, Anthony; Delaigue, Olivier; Jean, Pauline; Dejean, Tony	JOURNAL OF FISH BIOLOGY		2019						10.1111/jfb.14176
				x	Beyond traditional biodiversity fish monitoring: environmental DNA metabarcoding and simultaneous underwater visual census detect different sets of a complex fish community at a marine biodiversity hotspot.	Valdivia-Carrillo, T., Rocha-Olivares, A., Reyes-Bonilla, H., Domínguez-Contreras, J.F. and Munguia-Vega, A.	bioRxiv	JAN	2020					p.806729
	x		x		Linking Environmental DNA and RNA for Improved Detection of the Marine Invasive Fanworm Sabella spallanzanii	von Ammon, Ulla; Wood, Susanna A.; Laroche, Olivier; Zaiko, Anastasija; Lavery, Shane D.; Inglis, Graeme J.; Pochon, Xavier	FRONTIERS IN MARINE SCIENCE	OCT 15 2019	2019	6				621	10.3389/fmars.2019.00621
		x			Assessment of fish communities using environmental DNA: Effect of spatial sampling design in lentic systems of different sizes	Zhang, Shan; Lu, Qi; Wang, Yiyan; Wang, Xiaomei; Zhao, Jindong; Yao, Meng	MOLECULAR ECOLOGY RESOURCES	JAN 2020	2020	20	1	242	255		10.1111/1755-0998.13105
23	3	31	34	5
Rationale key:
1	Did not sample natural aquatic system (i.e. mesocosm or experimental system, gut content analysis, substrate was not water)
2	Did not use metabarcoding (i.e. used targeted qPCR or ddPCR)
3	Did not provide traditional survey or historical presence data for study area
4	Did not measure fish species richness (i.e. measured OTUS, MOTUs, other taxonomic groups, or did not provide species-level data)
5	Was not a peer-reviewed, published research article

## Sheet: Retained records
RETAINED RECORDS
Count:	37
Title	Authors	Source Title	Publication Date	Publication Year	Volume	Issue	Beginning Page	Ending Page	Article Number	DOI	Notes
Environmental DNA detection of rare and invasive fish species in two Great Lakes tributaries	Balasingham, Katherine D.; Walter, Ryan P.; Mandrak, Nicholas E.; Heath, Daniel D.	MOLECULAR ECOLOGY	JAN 2018	2018	27	1	112	127		10.1111/mec.14395
Unlocking biodiversity and conservation studies in high-diversity environments using environmental DNA (eDNA): A test with Guianese freshwater fishes	Cilleros, Kevin; Valentini, Alice; Allard, Luc; et al.	MOLECULAR ECOLOGY RESOURCES	JAN	2019	19	1	27	46
Spatial representativeness of environmental DNA metabarcoding signal for fish biodiversity assessment in a natural freshwater system	Civade, R., Dejean, T., Valentini, A., Roset, N., Raymond, J.C., Bonin, A., Taberlet, P. and Pont, D.	PLOS ONE	JUN	2016	11	6			e0157366
Assessing the utility of eDNA as a tool to survey reef-fish communities in the Red Sea	DiBattista, Joseph D.; Coker, Darren J.; Sinclair-Taylor, Tane H.; Stat, Michael; Berumen, Michael L.; Bunce, Michael	CORAL REEFS	DEC 2017	2017	36	4	1245	1252		10.1007/s00338-017-1618-1
Fish community assessment with eDNA metabarcoding: effects of sampling design and bioinformatic filtering	Evans, Nathan T.; Li, Yiyuan; Renshaw, Mark A.; Olds, Brett P.; Deiner, Kristy; Turner, Cameron R.; Jerde, Christopher L.; Lodge, David M.; Lamberti, Gary A.; Pfrender, Michael E.	CANADIAN JOURNAL OF FISHERIES AND AQUATIC SCIENCES	SEP 2017	2017	74	9	1362	1374		10.1139/cjfas-2016-0306
Environmental DNA metabarcoding for fish community analysis in backwater lakes: A comparison of capture methods	Fujii, Kazuya; Doi, Hideyuki; Matsuoka, Shunsuke; et al.	PLOS ONE	JAN	2019	14	1			e0210357
Direct fishing and eDNA metabarcoding for biomonitoring during a 3-year survey significantly improves number of fish detected around a South East Asian reservoir	Gillet, Benjamin; Cottet, Maud; Destanque, Thibault; Kue, Kaoboun; Descloux, Stephane; Chanudet, Vincent; Hughes, Sandrine	PLOS ONE	DEC 13 2018	2018	13	12			e0208592	10.1371/journal.pone.0208592
Environmental DNA metabarcoding of lake fish communities reflects long-term data from established survey methods	Hanfling, Bernd; Handley, Lori Lawson; Read, Daniel S.; Hahn, Christoph; Li, Jianlong; Nichols, Paul; Blackman, Rosetta C.; Oliver, Anna; Winfield, Ian J.	MOLECULAR ECOLOGY	JUL 2016	2016	25	13	3101	3119		10.1111/mec.13660
Detection of rare and invasive freshwater fish species using eDNA pyrosequencirig: Lake Iznik ichthyofauna revised	Keskin, Emre; Unal, Esra Mine; Atar, Hasan Huseyin	BIOCHEMICAL SYSTEMATICS AND ECOLOGY	AUG 2016	2016	67		29	36		10.1016/j.bse.2016.05.020
Environmental DNA metabarcoding as an effective and rapid tool for fish monitoring in canals.	McDevitt, A.D., Sales, N.G., Browett, S.S., Sparnenn, A.O., Mariani, S., Wangensteen, O.S., Coscia, I. and Benvenuto, C.	JOURNAL OF FISH BIOLOGY		2019
Comparing local- and regional-scale estimations of the diversity of stream fish using eDNA metabarcoding and conventional observation methods	Nakagawa, Hikaru; Yamamoto, Satoshi; Sato, Yukuto; Sado, Tetsuya; Minamoto, Toshifumi; Miya, Masaki	FRESHWATER BIOLOGY	JUN 2018	2018	63	6	569	580		10.1111/fwb.13094
Estimating species richness using environmental DNA	Olds, Brett P.; Jerde, Christopher L.; Renshaw, Mark A.; Li, Yiyuan; Evans, Nathan T.; Turner, Cameron R.; Deiner, Kristy; Mahon, Andrew R.; Brueseke, Michael A.; Shirey, Patrick D.; Pfrender, Michael E.; Lodge, David M.; Lamberti, Gary A.	ECOLOGY AND EVOLUTION	JUN 2016	2016	6	12	4214	4226		10.1002/ece3.2186
Environmental DNA reveals quantitative patterns of fish biodiversity in large rivers despite its downstream transportation	Pont, Didier; Rocle, Mathieu; Valentini, Alice; Civade, Raphael; Jean, Pauline; Maire, Anthony; Roset, Nicolas; Schabuss, Michael; Zornig, Horst; Dejean, Tony	SCIENTIFIC REPORTS	JUL 10 2018	2018	8				10361	10.1038/s41598-018-28424-8
Comparison of environmental DNA metabarcoding and conventional fish survey methods in a river system	Shaw, Jennifer L. A.; Clarke, Laurence J.; Wedderburn, Scotte D.; Barnes, Thomas C.; Weyrich, Laura S.; Cooper, Alan	BIOLOGICAL CONSERVATION	MAY 2016	2016	197		131	138		10.1016/j.biocon.2016.03.010
Seawater environmental DNA reflects seasonality of a coastal fish community	Sigsgaard, Eva Egelyng; Nielsen, Ida Broman; Carl, Henrik; Krag, Marcus Anders; Knudsen, Steen Wilhelm; Xing, Yingchun; Holm-Hansen, Tore Hejl; Moller, Peter Rask; Thomsen, Philip Francis	MARINE BIOLOGY	JUN 2017	2017	164	6			128	10.1007/s00227-017-3147-4
Combined use of eDNA metabarcoding and video surveillance for the assessment of fish biodiversity	Stat, Michael; John, Jeffrey; DiBattista, Joseph D.; et al.	CONSERVATION BIOLOGY		2018	0	0	1	10		10.1111/cobi.13183
Detection of a Diverse Marine Fish Fauna Using Environmental DNA from Seawater Samples	Thomsen, Philip Francis; Kielgast, Jos; Iversen, Lars Lonsmann; Moller, Peter Rask; Rasmussen, Morten; Willerslev, Eske	PLOS ONE	AUG 29 2012	2012	7	8			e41732	10.1371/journal.pone.0041732
Environmental DNA from Seawater Samples Correlate with Trawl Catches of Subarctic, Deepwater Fishes	Thomsen, Philip Francis; Moller, Peter Rask; Sigsgaard, Eva Egelyng; Knudsen, Steen Wilhelm; Jorgensen, Ole Ankjaer; Willerslev, Eske	PLOS ONE	NOV 16 2016	2016	11	11			e0165252	10.1371/journal.pone.0165252
Next-generation monitoring of aquatic biodiversity using environmental DNA metabarcoding	Valentini, Alice; Taberlet, Pierre; Miaud, Claude; Civade, Raphael; Herder, Jelger; Thomsen, Philip Francis; Bellemain, Eva; Besnard, Aurelien; Coissac, Eric; Boyer, Frederic; Gaboriaud, Coline; Jean, Pauline; Poulet, Nicolas; Roset, Nicolas; Copp, Gordon H.; Geniez, Philippe; Pont, Didier; Argillier, Christine; Baudoin, Jean-Marc; Peroux, Tiphaine; Crivelli, Alain J.; Olivier, Anthony; Acqueberg…	MOLECULAR ECOLOGY	FEB 2016	2016	25	4	929	942		10.1111/mec.13428
Environmental DNA metabarcoding reveals local fish communities in a species-rich coastal sea	Yamamoto, Satoshi; Masuda, Reiji; Sato, Yukuto; Sado, Tetsuya; Araki, Hitoshi; Kondoh, Michio; Minamoto, Toshifumi; Miya, Masaki	SCIENTIFIC REPORTS	JAN 12 2017	2017	7				40368	10.1038/srep40368
Optimizing environmental DNA sampling effort for fish inventories in tropical streams and rivers	Cantera, Isabel; Cilleros, Kevin; Valentini, Alice; et al	SCIENTIFIC REPORTS	FEB	2019	9				3085
Marine Vertebrate Biodiversity and Distribution Within the Central California Current Using Environmental DNA (eDNA) Metabarcoding and Ecosystem Surveys	Closek, Collin J.; Santora, Jarrod A.; Starks, Hilary A.; Schroeder, Isaac D.; Andruszkiewicz, Elizabeth A.; Sakuma, Keith M.; Bograd, Steven J.; Hazenv, Elliott L.; Field, John C.; Boehm, Alexandria B.	FRONTIERS IN MARINE SCIENCE	DEC 16 2019	2019	6				732	10.3389/fmars.2019.00732
Testing the performance of environmental DNA metabarcoding for surveying highly diverse tropical fish communities: A case study from Lake Tanganyika	Doble, C.J., Hipperson, H., Salzburger, W., Horsburgh, G.J., Mwita, C., Murrell, D.J. and Day, J.J.	Environmental DNA	Nov	2019
Fish diversity assessment in the headwaters of the Volga River using environmental DNA metabarcoding	Lecaudey, Laurene A.; Schletterer, Martin; Kuzovlev, Vyacheslav V.; Hahn, Christoph; Weiss, Steven J.	AQUATIC CONSERVATION-MARINE AND FRESHWATER ECOSYSTEMS	OCT 2019	2019	29	10	1785	1800		10.1002/aqc.3163
Comparison of fish detections, community diversity, and relative abundance using environmental DNA metabarcoding and traditional gears	Sard, N.M., Herbst, S.J., Nathan, L., Uhrig, G., Kanefsky, J., Robinson, J.D. and Scribner, K.T.	Environmental DNA	NOV	2019	1	4	368	384
eDNA metabarcoding as a promising conservation tool for monitoring fish diversity in a coastal wetland of the Pearl River Estuary compared to bottom trawling	Zou, Keshu; Chen, Jianwei; Ruan, Huiting; Li, Zhenhai; Guo, Wenjie; Li, Min; Liu, Li	SCIENCE OF THE TOTAL ENVIRONMENT	FEB 1 2020	2020	702				UNSP 134704	10.1016/j.scitotenv.2019.134704
Ground-truthing of a fish-based environmental DNA metabarcoding method for assessing the quality of lakes	Li, Jianlong; Hatton-Ellis, Tristan W.; Handley, Lori-Jayne Lawson; et al.	JOURNAL OF APPLIED ECOLOGY	MAY	2019	56	5	1232	1244
MANUAL ADDITIONS (identified prior to 1 April 2020 by MEM and KLD)
Temporal and spatial variation in distribution of fish environmental DNA in England’s largest lake.	Lawson Handley, L., Read, D.S., Winfield, I.J., Kimbell, H., Johnson, H., Li, J., Hahn, C., Blackman, R., Wilcox, R., Donnelly, R. and Szitenberg, A.	ENVIRONMENTAL DNA	JAN	2019			1	14		10.1002/edn3.5
Next-generation freshwater bioassessment: eDNA metabarcoding with a conserved metazoan primer reveals species-rich and reservoir-specific communities.	Lim, N.K., Tay, Y.C., Srivathsan, A., Tan, J.W., Kwik, J.T., Baloğlu, B., Meier, R. and Yeo, D.C.	ROYAL SOCIETY OPEN SCIENCE	NOV 1 2016	2016	3	11	160635			10.1098/rsos.160635
Aquatic environmental DNA detects seasonal fish abundance and habitat preference in an urban estuary	Stoeckle, M.Y., Soboleva, L. and Charlop-Powers, Z.	PLOS ONE	APR 12 2017	2017	12	4			e0175186	10.1371/journal.pone.0175186
Quantitative monitoring of multispecies fish environmental DNA using high-throughput sequencing.	Ushio, M., Murakami, H., Masuda, R., Sado, T., Miya, M., Sakurai, S., Yamanaka, H., Minamoto, T. and Kondoh, M.	METABARCODING AND METAGENOMICS	MAR 14 2018	2018	2		1	15		10.3897/mbmg.2.23297
Using eDNA to biomonitor the fish community in a tropical oligotrophic lake	Valdez-Moreno, M., Ivanova, N.V., Elias-Gutierrez, M., Pedersen, S.L., Bessonov, K. and Hebert, P.D.	PLOS ONE	APR 22 2019	2019	14	4			e0215505	10.1371/journal.pone.0215505	Originally identified on bioRxiv in 2018, subsequently published in Apr 2019.
Seasonal dynamics of riverine fish communities using eDNA	Milhau, T., Valentini, A., Poulet, N., Roset, N., Jean, P., Gaboriaud, C. and Dejean, T.	JOURNAL OF FISH BIOLOGY	NOV 1 2019	2019						10.1111/jfb.14190
Non‐specific amplification compromises environmental DNA metabarcoding with COI.	Collins, R.A., Bakker, J., Wangensteen, O.S., Soto, A.Z., Corrigan, L., Sims, D.W., Genner, M.J. and Mariani, S.	METHODS IN ECOLOGY AND EVOLUTION	AUG 2 2019	2019	10	11	1985	2001		10.1111/2041-210X.13276
Maximizing fish detection with eDNA metabarcoding	Bessey, C., Jarman, S.N., Berry, O., Olsen, Y.S., Bunce, M., Simpson, T., Power, M., McLaughlin, J., Edgar, G.J. and Keesing, J.	ENVIRONMENTAL DNA	FEB 20 2020	2020						10.1002/edn3.74
Monitoring riverine fish communities through eDNA metabarcoding: determining optimal sampling strategies along an altitudinal and biodiversity gradient	Bylemans, J., Gleeson, D.M., Lintermans, M., Hardy, C.M., Beitzel, M., Gilligan, D.M. and Furlan, E.M.	Metabarcoding and Metagenomics	DEC 31 2018	2018	2				e30457
Analysis of a coastal North Sea fish community: Comparison of aquatic environmental DNA concentrations to fish catches.	van Bleijswijk, J.D., Engelmann, J.C., Klunder, L., Witte, H.J., Witte, J.I. and van der Veer, H.W.	ENVIRONMENTAL DNA	FEB 5 2020	2020						10.1002/edn3.67
